# Supplementary material for: Linking Phospho-Gonadotropin Regulated Testicular RNA Helicase (GRTH/DDX25) to Histone Ubiquitination and Acetylation Essential for Spermatid Development During Spermiogenesis
Source: Front Cell Dev Biol. 2020 May 15;8:310. doi: 10.3389/fcell.2020.00310 (PMC7242631; doi:10.3389/fcell.2020.00310)
Supplement: Supplementary file 4 [file Table_4.XLS]

## Sheet: gene_list (4)
List of DEGs generated from the analysis of gene count data using DESeq2
RefSeq gene name	Total counts	P-value	FDR	Fold change
1700063D05Rik	847.482	3.64905e-24	3.58138e-22	-663.378
Calml3	229.525	3.6475e-16	1.87913e-14	-266.866
Ddx25	41660.5	3.27194e-10	7.91543e-09	-81.4659
Sox14	61.8808	2.25495e-06	2.81996e-05	-31.7
Tmod4	181.705	2.87729e-13	1.04984e-11	-18.3938
1700084D21Rik	796.982	1.48582e-39	3.9052e-37	-17.9553
Prokr1	227.453	2.24547e-14	9.31029e-13	-14.4224
Gm28881	104.397	2.34584e-09	4.94253e-08	-13.163
4930552N02Rik	241.699	1.16969e-13	4.48969e-12	-12.6981
Cyp2a12	234.569	2.21558e-06	2.78178e-05	-12.2361
Olfr733	364.416	1.5976e-24	1.6087e-22	-12.0456
Nfe2	242.976	5.53407e-17	3.14347e-15	-11.9485
Dscaml1	387.607	1.15754e-29	1.58849e-27	-11.5962
Cd164l2	194.144	2.06157e-12	6.64632e-11	-11.1687
Lrrc57	18314.1	1.09664e-84	3.40111e-81	-11.1139
1700008P02Rik	2127.56	8.11433e-40	2.2878e-37	-10.7512
Gm5893	10785.1	2.26402e-84	5.85136e-81	-10.2651
Wbscr25	31527.3	7.25842e-68	1.02324e-64	-9.85654
Prm2	492202	1.80477e-42	6.99665e-40	-9.60565
1700012A03Rik	25538.9	3.93614e-22	3.31727e-20	-9.42015
Azin2	42137.7	1.88643e-121	2.92529e-117	-9.36058
Mucl1	114.857	2.63949e-09	5.48667e-08	-9.23675
Ppp2r2b	6779.06	3.90982e-58	4.04197e-55	-8.82109
Ubqlnl	31005.2	2.05033e-47	1.09636e-44	-8.76095
Car2	17926.4	1.14482e-48	7.10109e-46	-8.7469
1700009J07Rik	9696.33	3.14518e-38	7.27946e-36	-8.72236
1700020A23Rik	4065.83	5.32965e-42	1.96778e-39	-8.45187
Wnt3	3585.09	4.30963e-49	2.78456e-46	-8.26772
Fam131b	1908.27	1.10769e-39	3.0135e-37	-8.21219
Chrna2	178.05	9.56111e-10	2.14565e-08	-8.12008
4930447F24Rik	84.3348	2.08929e-06	2.64695e-05	-8.04696
Acte1	10661.7	2.2525e-59	2.49496e-56	-8.01318
Crisp1	59.3072	0.0328828	0.104533	-7.92365
Tmem56	13371.7	3.65806e-38	8.342e-36	-7.81984
Tssk6	65229.9	5.47559e-43	2.29486e-40	-7.80845
Slc18a3	203.337	1.88307e-13	7.05333e-12	-7.79841
Efcab1	956.555	8.4499e-26	9.09948e-24	-7.65676
1700016H13Rik	19165.4	7.4118e-37	1.57445e-34	-7.57973
Dydc2	2888.66	1.0465e-15	5.08716e-14	-7.54479
5031439G07Rik	15286.9	1.8256e-95	1.06183e-91	-7.48824
Klk1b8	2037.42	3.64231e-31	5.27862e-29	-7.47281
1700029B22Rik	2013.92	2.78333e-13	1.02036e-11	-7.38668
Tppp2	20311	1.32525e-12	4.36321e-11	-7.35474
Adam39	6286.8	2.67101e-67	3.45162e-64	-7.29474
Spem2	45880	2.05422e-95	1.06183e-91	-7.23748
Rxrg	101.091	5.58894e-07	7.87888e-06	-7.20028
4933433H22Rik	213.33	2.10434e-12	6.77012e-11	-7.18554
Prm1	272925	5.252e-15	2.37442e-13	-6.97539
1700027A15Rik	26789	6.78865e-16	3.40685e-14	-6.86545
Arl9	546.746	1.30321e-17	7.71331e-16	-6.78893
Smcp	175695	2.45288e-70	3.80368e-67	-6.7387
Ttc24	3244.68	3.85538e-32	6.16344e-30	-6.72688
4930431P22Rik	184.177	5.57596e-12	1.70882e-10	-6.66652
Spata18	57058.5	5.0288e-95	1.94954e-91	-6.61104
Lexm	3354.63	8.23229e-27	9.31811e-25	-6.58545
Cabs1	56973.5	5.12895e-36	1.04651e-33	-6.57997
Fscn3	23826.9	1.28768e-34	2.43513e-32	-6.4281
1700024F13Rik	196.461	2.61035e-07	3.91477e-06	-6.3187
Spem1	54327.7	9.92452e-53	7.32855e-50	-6.21353
Hoxc9	235.13	1.92748e-10	4.83648e-09	-6.15095
4930544D05Rik	7242.22	2.71897e-12	8.67552e-11	-5.94794
Odf1	149332	3.99039e-74	8.83985e-71	-5.86222
4933411K16Rik	117867	5.54486e-58	5.37401e-55	-5.79602
Gm13539	309.382	1.03148e-08	1.98206e-07	-5.64718
Paqr5	6740.63	2.00068e-14	8.33993e-13	-5.62507
Oaz3	173557	1.39573e-40	4.24385e-38	-5.62012
1700003P14Rik	2377.41	8.52837e-28	1.058e-25	-5.61304
Fam71f2	38489.4	1.81603e-39	4.6166e-37	-5.56487
Filip1	1929	1.48777e-35	2.92036e-33	-5.55037
4930407I19Rik	146.377	6.94943e-09	1.36931e-07	-5.54096
Reep6	80329	2.66264e-73	5.1612e-70	-5.41279
Nudt16l2	15309.2	1.7946e-14	7.54171e-13	-5.38769
Gm614	6674.95	1.96404e-11	5.5476e-10	-5.36127
St6galnac2	63920.2	1.48852e-62	1.77557e-59	-5.28333
Nnmt	152.293	1.025e-08	1.97204e-07	-5.27967
4921507P07Rik	31479.9	6.90761e-15	3.06047e-13	-5.20771
Spata3	34921.1	1.88803e-38	4.43601e-36	-5.15848
Spata32	7217.91	3.314e-34	5.90692e-32	-5.15521
4930579D09Rik	364.529	2.66971e-13	9.81022e-12	-5.11723
Klk1b3	142.753	1.26579e-08	2.40542e-07	-5.1088
4930428D20Rik	1248.09	1.6781e-19	1.17748e-17	-5.09939
Cldn3	5220.7	6.62482e-46	3.21035e-43	-5.08675
Ppm1l	1687.34	1.22453e-38	2.92136e-36	-5.08001
Glrx2	3291.34	6.57876e-56	6.00099e-53	-5.07002
Moxd1	98.8831	0.000137777	0.00109285	-5.0023
Nat8f4	4192.2	1.71139e-42	6.80474e-40	-4.99836
1700109H08Rik	2903.28	1.57551e-47	8.7255e-45	-4.97135
Mical3	24431.6	1.00339e-37	2.22279e-35	-4.90873
1700096J18Rik	917.406	8.5998e-14	3.35912e-12	-4.88553
1700042G07Rik	8826.68	7.77142e-13	2.70205e-11	-4.86819
4930519F24Rik	203.499	1.3696e-08	2.57747e-07	-4.83207
Hal	224.305	0.00325706	0.016511	-4.81714
Fam214b	6445.59	6.15385e-39	1.53916e-36	-4.80982
4933427E13Rik	102.269	1.53316e-05	0.000156002	-4.77945
Tnp2	284580	7.01446e-42	2.47212e-39	-4.77286
Oxct2b	34691.2	1.10247e-47	6.33185e-45	-4.77188
Clmn	40955.5	7.22191e-46	3.39364e-43	-4.74181
Pax1	244.287	1.30457e-10	3.32183e-09	-4.72201
1700083H02Rik	267.681	3.30207e-08	5.78589e-07	-4.69245
1700015G11Rik	4770.66	2.48374e-06	3.05678e-05	-4.68112
Pnma2	844.593	2.16586e-29	2.89534e-27	-4.64655
Tssk3	19005.5	2.14683e-55	1.8495e-52	-4.62059
Adam25	6116.1	1.57414e-41	5.30657e-39	-4.60846
Abi3	4740.19	4.52734e-41	1.40411e-38	-4.58747
Mlkl	800.279	8.42957e-26	9.09948e-24	-4.58007
1700047A11Rik	294.254	5.48499e-11	1.46648e-09	-4.53929
Hmgb1-rs17	4516.1	6.56026e-10	1.50935e-08	-4.50586
1810065E05Rik	162.181	7.71715e-09	1.51098e-07	-4.47367
Gapdhs	128329	1.93287e-36	4.05041e-34	-4.469
1700031P21Rik	306.084	1.01736e-08	1.95977e-07	-4.45188
1700031M16Rik	4876.97	3.09348e-09	6.38049e-08	-4.43062
1700019P21Rik	313.401	8.54965e-12	2.54708e-10	-4.43037
Speg	405.211	4.95145e-07	7.06367e-06	-4.40667
Hspa1l	80450	2.57617e-28	3.24786e-26	-4.40438
Prkcq	14154.4	1.82691e-44	8.3323e-42	-4.39327
Lelp1	27080.5	1.59752e-26	1.76948e-24	-4.38453
4930549C15Rik	189.912	5.06732e-05	0.000452905	-4.3786
Gm6760	6417.45	3.40159e-08	5.93346e-07	-4.37595
Phospho1	19748	1.38137e-34	2.58083e-32	-4.36497
Dnajb8	42493.4	9.45285e-24	8.88396e-22	-4.34709
Tex37	10721.5	4.28969e-10	1.01558e-08	-4.34203
Gstcd	3492.24	5.93992e-29	7.80596e-27	-4.33516
1700048M11Rik	238.438	1.34264e-06	1.76744e-05	-4.33364
4930571K23Rik	108482	2.81418e-37	6.06104e-35	-4.33246
Atl3	58366.2	6.33082e-46	3.16684e-43	-4.23721
Tex46	1899.93	1.03693e-15	5.06279e-14	-4.2301
Gm15350	524.544	5.67343e-15	2.54272e-13	-4.22418
Agpat2	9224.08	4.27772e-22	3.58565e-20	-4.18961
Knstrn	12708.6	1.03354e-32	1.73757e-30	-4.175
Gm5901	4946.97	1.69276e-18	1.0847e-16	-4.15936
Gsg1	227009	3.72526e-41	1.17893e-38	-4.15099
Tnp1	173934	7.84066e-08	1.29346e-06	-4.14421
Ttc7	16776.8	1.64191e-37	3.58608e-35	-4.1371
Gm21283	1261.85	8.73399e-07	1.18183e-05	-4.09522
Ptp4a3	5222.46	1.98634e-41	6.55366e-39	-4.08178
Prkar2a	22956	1.36793e-31	2.03966e-29	-4.03853
Tmem225	6396.19	6.17081e-44	2.73402e-41	-4.00363
Pim1	13840.2	8.43703e-71	1.4537e-67	-3.9658
Spatc1	13410	7.54174e-24	7.21912e-22	-3.96225
Arhgap8	102.489	0.00101389	0.00613675	-3.94225
4933406G16Rik	379.179	2.94634e-14	1.19918e-12	-3.93321
Camsap3	2331.44	3.07251e-25	3.21928e-23	-3.9218
1700001C19Rik	24339.1	8.49387e-17	4.77227e-15	-3.91364
Rsf1os1	192.459	0.000382264	0.00266177	-3.91213
Flrt3	354.246	7.12085e-14	2.80261e-12	-3.89946
Prm3	5429.97	4.77514e-27	5.56753e-25	-3.87936
1700001O22Rik	25199.9	6.33879e-29	8.26014e-27	-3.85555
Slco1a5	107.164	0.000165695	0.0012796	-3.85487
Ubl4b	38350	7.00855e-18	4.31276e-16	-3.84191
Gm11780	37496.3	4.44737e-31	6.38568e-29	-3.83678
Gm5767	2163.18	3.61554e-12	1.13037e-10	-3.83096
2410141K09Rik	304.945	3.39514e-08	5.92887e-07	-3.82915
Cdrt4	18283.7	9.14324e-24	8.64538e-22	-3.82127
Vasp	4773.59	6.55324e-23	5.8403e-21	-3.81015
2810408A11Rik	26630.1	5.76442e-42	2.07881e-39	-3.7895
Cstl1	5811.8	1.20747e-14	5.20117e-13	-3.784
Iqcf3	53760.6	9.39411e-32	1.42818e-29	-3.74661
1700009N14Rik	59883.1	7.48146e-36	1.48737e-33	-3.72701
1700024P04Rik	10816.1	2.88226e-07	4.27705e-06	-3.72329
1700034E13Rik	6482.58	2.20523e-05	0.000216845	-3.70447
Bpifa3	9542.74	1.27773e-17	7.60512e-16	-3.69663
Ccdc91	38386.3	3.57117e-31	5.22435e-29	-3.68416
Dlx4	138	1.45507e-06	1.89611e-05	-3.6609
Csnk1g2	86603.5	2.67605e-41	8.6453e-39	-3.65472
Akap4	250618	4.56363e-36	9.43577e-34	-3.65401
Cdiptos	37395.5	6.86338e-23	6.08174e-21	-3.64588
Gm19395	1621.76	4.77095e-11	1.29115e-09	-3.64566
1700074H08Rik	363.138	1.5068e-08	2.81856e-07	-3.63904
Pdzd8	43959.9	1.14311e-39	3.05625e-37	-3.63227
Ube2k	17456.7	1.20951e-42	4.93576e-40	-3.60033
Gm3409	260.246	1.3761e-08	2.58343e-07	-3.59263
Defb33	1474.72	4.03737e-11	1.10224e-09	-3.58215
Tspan6	10620.2	2.70718e-14	1.11059e-12	-3.5755
Ptprv	1056.55	5.82929e-11	1.55318e-09	-3.57004
Elmo3	235.214	6.2797e-09	1.24367e-07	-3.56172
Dcun1d1	20414.5	3.85376e-20	2.87309e-18	-3.55837
Gm11634	1912.14	6.55904e-06	7.31734e-05	-3.55398
4930503B20Rik	27992.4	7.97062e-08	1.30933e-06	-3.54433
Neurl1a	5367.89	1.88468e-34	3.47926e-32	-3.54338
4930406D18Rik	3185.73	1.28003e-17	7.60512e-16	-3.54174
Unc5a	303.007	8.03972e-12	2.41145e-10	-3.53975
Tmem239	10756.2	8.47916e-21	6.70849e-19	-3.53592
Plekho2	5799.66	1.71932e-40	5.1272e-38	-3.50645
1700016P04Rik	5592.75	4.09939e-15	1.8752e-13	-3.50097
Sost	87.968	0.000962002	0.0058639	-3.49958
Cyp19a1	224.979	1.89387e-08	3.45509e-07	-3.48908
Gm136	4571.69	1.5937e-12	5.19191e-11	-3.48167
Tmem269	4815.49	9.2017e-14	3.5852e-12	-3.46217
Tafa4	126.656	3.26014e-05	0.000305284	-3.44768
Cdk18	920.061	3.65001e-19	2.45025e-17	-3.44487
Dbil5	132929	8.42606e-09	1.64149e-07	-3.44261
Npcd	1396.93	3.81054e-17	2.18852e-15	-3.43285
Slc25a37	5321	5.91711e-23	5.3103e-21	-3.42083
Ptpn7	274.301	6.52855e-08	1.09211e-06	-3.41703
Tfam	7106.79	3.60869e-15	1.65562e-13	-3.40443
Lipe	24071.3	7.04851e-22	5.8139e-20	-3.4038
Kif16bos	692.821	2.44517e-15	1.13525e-13	-3.40034
Mfap3l	29233.3	7.3015e-36	1.47045e-33	-3.39883
Diras2	422.92	3.32846e-09	6.81828e-08	-3.38459
Slc22a12	127.139	0.000131744	0.00105743	-3.37947
Bco2	105.885	0.000219514	0.00164763	-3.37332
BB014433	33881.4	1.52955e-33	2.66503e-31	-3.37172
Isg20l2	13018.8	3.91498e-34	6.89882e-32	-3.36883
Spz1	166255	2.52582e-22	2.15209e-20	-3.36829
Myh1	132.405	0.000136447	0.00108897	-3.35508
Fam187b	27002.9	2.78035e-21	2.25732e-19	-3.35433
4930412O13Rik	1374.8	4.07262e-32	6.44429e-30	-3.35262
Oxct2a	30352.4	2.98733e-25	3.15133e-23	-3.34958
1700012H19Rik	1102.72	1.11365e-14	4.82385e-13	-3.3472
Acsl1	83935.3	2.96918e-34	5.41683e-32	-3.28384
Klhl28	3467.01	4.2475e-53	3.2933e-50	-3.27771
Actl11	56278.6	5.28753e-27	6.11893e-25	-3.27101
Gpi1	38561.2	6.09347e-32	9.43732e-30	-3.26694
Gm35496	265.443	6.69277e-08	1.11837e-06	-3.2527
1700052I22Rik	763.673	7.67951e-09	1.50551e-07	-3.25114
Olfr128	635.094	1.6467e-08	3.05082e-07	-3.24816
Slamf9	615.425	4.0895e-10	9.7413e-09	-3.24637
1700034I23Rik	31376.1	4.01215e-40	1.1739e-37	-3.24636
Rnf133	13954.6	9.16663e-20	6.67356e-18	-3.24458
9130204L05Rik	86.6334	0.00300096	0.0154194	-3.24097
4930572K03Rik	1045.69	2.51563e-20	1.92167e-18	-3.23762
Txndc2	56066.7	8.79143e-16	4.35555e-14	-3.23536
Gm10731	23997.7	1.15105e-34	2.20361e-32	-3.23379
Ms4a5	7327.73	1.03603e-15	5.06279e-14	-3.22996
Rcc1	18531.9	3.54809e-53	2.89581e-50	-3.21834
Fabp12	3823.87	4.1426e-16	2.12011e-14	-3.21326
Fam184b	145.166	6.38179e-05	0.000555656	-3.21304
Lrrc8b	89603.9	1.94516e-27	2.33827e-25	-3.20956
Herpud1	18991	2.06757e-21	1.69639e-19	-3.20887
Syt13	139.149	0.00077869	0.00492863	-3.1862
Tmem132cos	1051.14	9.45725e-13	3.20905e-11	-3.18602
AF366264	9102.16	1.9389e-28	2.46447e-26	-3.16995
Prkag2os1	213.261	1.05003e-05	0.000111221	-3.16977
Kcnk7	245.611	7.62877e-05	0.000654673	-3.16715
Asb17	14712.5	4.31172e-14	1.74119e-12	-3.1592
Bcl2l14	54275.6	3.59696e-30	4.98018e-28	-3.15677
1700122H20Rik	318.07	4.65988e-05	0.000420447	-3.14901
1700029H14Rik	42963.8	8.72894e-24	8.30428e-22	-3.14305
Nrxn1	2229.5	2.54519e-27	3.01284e-25	-3.13828
Fam243	37032	4.19448e-32	6.57008e-30	-3.13623
Grip1os1	332.989	1.6431e-08	3.04779e-07	-3.1349
Chl1	68102.4	1.62835e-31	2.40484e-29	-3.1306
H1fnt	54406.3	2.13616e-22	1.85059e-20	-3.13029
Guca1a	134.273	0.000310203	0.00222494	-3.12939
Hoxb3	374.272	2.55424e-10	6.26718e-09	-3.12796
Gm20714	522.589	2.95498e-12	9.37072e-11	-3.12417
4930512J16Rik	142.084	8.88686e-06	9.59001e-05	-3.11789
4933416I08Rik	107.617	0.019439	0.0698104	-3.10466
Ccdc54	34708.1	3.96629e-13	1.42373e-11	-3.09942
1700110C19Rik	519.733	3.57665e-12	1.12047e-10	-3.09338
H2al2a	16836.8	1.03687e-16	5.78373e-15	-3.08802
Syce2	14805.9	1.70505e-32	2.81278e-30	-3.08591
Eya4	4202.67	3.54534e-19	2.40077e-17	-3.08401
4930471G03Rik	10448.1	3.14064e-34	5.66302e-32	-3.0641
Gm11482	736.521	5.21059e-17	2.97061e-15	-3.06267
Rundc3a	5169.13	5.99348e-26	6.59155e-24	-3.06064
Tbx19	820.047	1.04899e-10	2.69315e-09	-3.04212
Habp4	36354.2	1.22155e-15	5.86457e-14	-3.03099
A1cf	833.093	8.08438e-20	5.91342e-18	-3.02655
4930543E12Rik	591.653	1.08795e-13	4.19672e-12	-3.01734
Jag1	3238.22	1.20153e-15	5.78639e-14	-3.00564
Hk1	219994	8.0494e-25	8.21198e-23	-3.00437
Ppm1a	38282.1	2.8763e-48	1.71549e-45	-3.00245
Adam20	10408	1.61196e-30	2.29328e-28	-2.99737
Skp2	12629.8	1.03822e-15	5.06279e-14	-2.97058
Pck1	127.514	0.0157715	0.0593947	-2.97052
Six4	284.441	4.59963e-07	6.59819e-06	-2.96363
Dab1	192.004	2.5141e-06	3.08679e-05	-2.96041
Pcsk1	151.757	0.000670746	0.00431587	-2.95822
Aqp1	97.4128	0.00298394	0.0153421	-2.95657
4930405O22Rik	485.459	1.48577e-10	3.76469e-09	-2.94716
Gzmn	3820.38	9.47357e-18	5.73854e-16	-2.93443
1700123M08Rik	459.058	5.67761e-08	9.56986e-07	-2.92959
4933412O06Rik	832.294	6.17642e-14	2.46215e-12	-2.91747
4930455F16Rik	1244.05	1.91796e-11	5.42734e-10	-2.91197
Fen1	4558.21	1.7589e-19	1.22862e-17	-2.91123
Naa60	4215.16	2.80134e-20	2.09857e-18	-2.91057
Atp1b3	45429.7	4.27642e-46	2.21048e-43	-2.9096
Noxred1	4275.45	5.61061e-12	1.71605e-10	-2.90559
Herpud2	16556.7	4.44405e-22	3.70505e-20	-2.90472
1700022A22Rik	878.088	1.07326e-07	1.7105e-06	-2.90085
Prss51	1424.26	1.27726e-09	2.78573e-08	-2.90026
4921517D22Rik	2372.24	6.26538e-14	2.49121e-12	-2.89449
Smim23	6312.43	1.51027e-16	8.27554e-15	-2.88202
Odf3b	987.882	9.74252e-07	1.30916e-05	-2.86851
Bri3bp	4903.59	3.51549e-50	2.3702e-47	-2.85345
Prkcd	14566.7	1.83337e-16	9.80345e-15	-2.8518
Kif1a	2527.53	7.34279e-16	3.67305e-14	-2.85066
Csnka2ip	34342.9	1.33587e-19	9.45909e-18	-2.84637
Klk1b26	732.805	4.08813e-06	4.79536e-05	-2.8384
Rnf138	55384.4	6.01559e-20	4.42103e-18	-2.82932
1110017D15Rik	31451.9	4.58091e-19	3.04876e-17	-2.82137
Nsun4	37239.7	4.60219e-24	4.48844e-22	-2.82046
4930413E15Rik	442.96	8.41534e-11	2.18222e-09	-2.81496
Mgat4e	2384.54	8.30326e-12	2.4809e-10	-2.81362
4930470O06Rik	205.299	0.00252912	0.0133534	-2.81095
Cep85l	24308.8	2.07181e-16	1.10026e-14	-2.79999
Prnd	5859.39	1.09463e-09	2.418e-08	-2.79805
Klk1b9	790.837	3.99719e-06	4.69579e-05	-2.79141
Hipk1	29870	1.92934e-27	2.33737e-25	-2.78788
Ankef1	50659.5	5.52588e-27	6.34739e-25	-2.78157
4933438B17Rik	405.901	2.15934e-08	3.89813e-07	-2.77749
Speer3	343.904	3.84289e-06	4.53513e-05	-2.77328
Ces1a	271.424	1.71866e-06	2.2154e-05	-2.77089
Dhrs2	197.957	2.13389e-05	0.000210498	-2.76825
1700049E15Rik	296.126	0.0427206	0.127545	-2.75799
Satl1	5463.74	1.64533e-16	8.9241e-15	-2.75711
Ifi209	1061.75	6.9997e-11	1.84286e-09	-2.75368
1700034G24Rik	2164.64	0.000110416	0.000902117	-2.7531
Gpat4	118860	8.70806e-35	1.68795e-32	-2.74965
4930523O13Rik	913.461	7.27081e-10	1.65078e-08	-2.74514
Flt4	875.033	1.99098e-13	7.42168e-12	-2.73929
Elavl4	244.298	5.59247e-05	0.000494991	-2.7392
1700081H04Rik	202.828	3.17e-06	3.78423e-05	-2.73585
4930471C04Rik	373.588	8.1703e-07	1.11395e-05	-2.72981
4930548J01Rik	136.378	0.00264186	0.0138591	-2.72974
Plcz1	21869.5	6.05033e-17	3.42418e-15	-2.7219
Tex28	137.859	0.000129739	0.00104242	-2.72172
4930449E01Rik	163.075	0.00347431	0.0174075	-2.71639
Osgin1	19147	2.7331e-19	1.89206e-17	-2.71231
Ppp1r2-ps7	3953.31	0.000947536	0.00579852	-2.71015
Spertl	4610.3	3.84402e-16	1.97381e-14	-2.70772
Smkr-ps	9086.13	9.60649e-24	8.97397e-22	-2.7041
4930545L23Rik	1368.58	2.22516e-12	7.14402e-11	-2.69587
Dscc1	1210.85	4.09123e-17	2.34106e-15	-2.67454
Iqcf4	19862.7	2.37353e-09	4.9873e-08	-2.67345
2610318N02Rik	54245.8	1.93009e-20	1.48168e-18	-2.6678
Slc30a4	13703.1	1.54635e-13	5.86289e-12	-2.64597
Pkib	7924.39	6.9541e-13	2.43976e-11	-2.64287
Tmsb15a	610.34	1.90194e-06	2.42744e-05	-2.64197
Ptrh1	713.177	1.13057e-12	3.7784e-11	-2.64005
4930589L23Rik	1073.03	1.81418e-18	1.15297e-16	-2.63562
Dclk1	351.546	3.93493e-08	6.81015e-07	-2.62727
Pou6f2	184.515	0.000126978	0.00102501	-2.6264
Akap1	83529.7	4.73858e-21	3.78769e-19	-2.62129
4930548G14Rik	292.17	3.40829e-06	4.0562e-05	-2.61927
Acsbg2	36614.6	1.87347e-24	1.87431e-22	-2.61686
1700110K17Rik	1131.56	9.99057e-15	4.40124e-13	-2.61619
Hmgb4	39992.7	5.13741e-11	1.38069e-09	-2.61515
Spert	63902.3	3.51048e-19	2.38759e-17	-2.61298
Vmn2r-ps54	463.875	2.31688e-06	2.88114e-05	-2.61223
Ntn5	274.981	4.38563e-06	5.10954e-05	-2.60842
Chpt1	11174.2	2.05033e-18	1.29774e-16	-2.60776
Wdr64	14397.7	2.55649e-20	1.93383e-18	-2.60693
4930474N09Rik	3068.42	1.84847e-23	1.69611e-21	-2.60143
Actg2	23016.7	1.90115e-17	1.10831e-15	-2.5995
Ly6g6c	1604.89	1.23749e-11	3.60033e-10	-2.59273
Gm6370	436.14	1.69254e-07	2.62463e-06	-2.58966
Gramd2	593.705	2.37551e-06	2.94226e-05	-2.5884
Camk4	4223.99	1.46376e-16	8.04911e-15	-2.58415
4930447M23Rik	174.057	9.56458e-05	0.00079527	-2.58359
Gm33677	1040.16	1.58672e-11	4.58197e-10	-2.57724
1700001K19Rik	19425.4	5.79338e-12	1.76153e-10	-2.5756
Scrt1	3017.97	1.19431e-15	5.76953e-14	-2.57403
Car15	190.782	3.05733e-05	0.000289439	-2.57029
Mroh7	22918.3	1.04207e-32	1.73757e-30	-2.56992
Arhgef28	187.85	2.87079e-05	0.000274968	-2.56297
1700016K05Rik	335.973	7.01449e-07	9.70328e-06	-2.5618
4931430N09Rik	217.559	0.000167372	0.00129126	-2.55714
Mroh3	246.355	2.96944e-05	0.000282497	-2.55414
4933402D24Rik	833.573	7.67019e-10	1.73637e-08	-2.54599
Ppifos	524.387	7.13039e-09	1.40141e-07	-2.54538
AI507597	20955.2	1.25535e-17	7.51609e-16	-2.5419
Mex3d	93878.1	2.25315e-22	1.94109e-20	-2.53736
4930473O22Rik	1088.04	6.49216e-10	1.4959e-08	-2.53544
Nqo2	2753.16	7.04297e-07	9.72532e-06	-2.5354
Gm5627	124.96	0.0082201	0.035193	-2.53431
4930404A05Rik	273.879	6.80668e-07	9.42422e-06	-2.53187
Pate14	113.494	0.00171321	0.00960128	-2.53034
Nt5c1b	77609	7.30639e-26	7.97889e-24	-2.52951
Cdc14a	20070.5	2.22859e-16	1.17948e-14	-2.52153
4930449I24Rik	642.503	6.01389e-12	1.81788e-10	-2.51815
Fev	681.322	3.33661e-06	3.97701e-05	-2.51212
Gm9758	444.433	9.26259e-06	9.94014e-05	-2.50952
Nemp2	1311.41	5.65461e-16	2.86556e-14	-2.50001
4930567K12Rik	110.481	0.00159641	0.00906794	-2.49304
Pdzk1	30662	5.80961e-29	7.69997e-27	-2.48639
1700017J07Rik	1155.75	9.83502e-10	2.20074e-08	-2.48598
Col20a1	2968.36	2.0309e-22	1.76928e-20	-2.48572
Arhgef6	2333.76	3.38e-10	8.15143e-09	-2.4853
Sigirr	371.435	1.78266e-05	0.000178692	-2.48514
1700020G17Rik	714.005	2.7024e-06	3.29192e-05	-2.48379
Pcdh9	320.916	3.51471e-07	5.13207e-06	-2.48038
BB557941	422.007	0.0186695	0.0675315	-2.47796
Ctnna3	7900.6	6.77944e-11	1.79401e-09	-2.47597
D730003I15Rik	96.5224	0.00874091	0.0370646	-2.46977
Fam71d	26391.1	4.90431e-10	1.15055e-08	-2.4688
Insyn2a	158.838	0.000348323	0.00245743	-2.46565
Ccdc70	16782.4	8.45982e-16	4.20469e-14	-2.46221
4933402C06Rik	356.546	2.24346e-05	0.000220186	-2.46103
Gm15091	105.096	0.0137793	0.0532725	-2.45784
Def6	135.861	0.00331465	0.0167537	-2.45769
Gm15517	2450.6	1.79364e-06	2.30439e-05	-2.45406
Sgsm2	3838.31	8.65474e-26	9.2558e-24	-2.44847
1700003E24Rik	8488.93	0.00105643	0.00636689	-2.44595
Tex50	7789.58	5.09388e-10	1.19141e-08	-2.43671
Eef1d	81457.4	1.62272e-29	2.18814e-27	-2.4319
4933421O10Rik	6690.65	2.37332e-23	2.15222e-21	-2.42862
Gm32817	661.018	6.82939e-06	7.5862e-05	-2.42814
4930568D16Rik	990.672	9.61519e-12	2.84005e-10	-2.42322
Slfnl1	35655.1	6.00956e-10	1.38883e-08	-2.42314
1700019M22Rik	15257	1.9408e-08	3.53239e-07	-2.41796
Gm9789	116.488	0.00189614	0.0104713	-2.41288
Fscb	52678.7	5.32711e-24	5.1309e-22	-2.41235
Ppp2r5a	2074.9	1.34557e-08	2.53533e-07	-2.40922
4930401O12Rik	320.875	8.06848e-06	8.79254e-05	-2.40665
Bag1	45452	2.96517e-33	5.10898e-31	-2.40539
Gm30853	662.097	9.19958e-08	1.48757e-06	-2.40472
Clpb	83481.5	5.87275e-22	4.86999e-20	-2.4046
Tbc1d20	44737.3	2.54852e-32	4.15999e-30	-2.4012
C030037D09Rik	6317.98	1.77979e-23	1.64281e-21	-2.39913
Lhx2	479.269	5.93667e-08	9.95243e-07	-2.39326
4930518J21Rik	178.778	0.00054226	0.0035828	-2.39157
4930479D17Rik	668.752	9.76681e-05	0.000809914	-2.38713
Sppl2c	38455.4	1.18527e-16	6.5643e-15	-2.3867
Actrt1	2629.11	1.05635e-08	2.02732e-07	-2.38605
Rnf38	52625.4	1.01823e-27	1.25314e-25	-2.38221
Rangap1	31137.6	2.17482e-27	2.59423e-25	-2.38199
Rnf139	79277.2	1.60639e-39	4.15172e-37	-2.38111
Otop1	287.123	5.71281e-06	6.52345e-05	-2.37774
8430426J06Rik	1049.42	7.96454e-11	2.07573e-09	-2.37739
4930482G09Rik	1058.06	5.83493e-06	6.60937e-05	-2.37672
Pmfbp1	67373.6	1.20373e-26	1.35263e-24	-2.37648
BC049715	5686.81	1.12818e-07	1.78883e-06	-2.37136
Sema6a	115.309	0.0020978	0.0114343	-2.37123
Srgap1	1546.62	1.41565e-09	3.06598e-08	-2.37077
Cst8	20751.9	7.08672e-13	2.48067e-11	-2.36614
Tbx18	220.643	0.00928165	0.0389107	-2.36531
Prr30	55259.7	1.51533e-20	1.17491e-18	-2.36326
Nxph1	166.045	0.000361681	0.00253909	-2.35866
Ccdc187	14399.5	1.89208e-11	5.36388e-10	-2.35664
Tmem53	42789	2.30961e-14	9.5507e-13	-2.35637
Nupr1l	22871	2.14651e-07	3.27941e-06	-2.35608
4933402N03Rik	2021.56	2.1295e-09	4.51739e-08	-2.35589
Tasp1	5195.86	1.0027e-14	4.40476e-13	-2.35301
Cnbd1	1494.54	1.16303e-12	3.87019e-11	-2.3513
Lrrc18	66897.8	1.53119e-12	5.00932e-11	-2.34738
Gm14781	1976.16	1.65443e-16	8.93913e-15	-2.34271
Wasf2	8780.16	2.15677e-23	1.96736e-21	-2.34146
Fam71e1	34588.4	7.5608e-13	2.63472e-11	-2.33864
Hypm	14175.5	0.00613355	0.0279439	-2.33689
Rbm28	6099.56	9.94467e-10	2.21888e-08	-2.33539
Pus3	934.376	4.30056e-10	1.0166e-08	-2.33492
Rgs17	146.318	0.00119035	0.00705072	-2.33323
Klhl31	570.711	2.03402e-08	3.69339e-07	-2.32879
1700072B07Rik	175.818	0.00230892	0.012372	-2.32876
Zfp239	1071.34	4.33146e-13	1.55122e-11	-2.32709
Tmem189	5604.2	3.23926e-16	1.67997e-14	-2.32347
Gm12911	152.254	0.000750029	0.00476668	-2.31251
Osbp2	101336	1.78016e-18	1.13601e-16	-2.31218
Stard6	17866.6	5.51919e-15	2.48076e-13	-2.31198
Tex35	16862	1.37679e-07	2.15874e-06	-2.31077
Klhl10	65327.6	3.41795e-24	3.37594e-22	-2.31059
Sema3e	110.412	0.00494676	0.0234729	-2.31011
Arl4a	62243.8	6.10375e-28	7.63313e-26	-2.30989
Gm10354	343.029	2.98965e-06	3.59662e-05	-2.30449
Gm3415	459.041	9.17798e-05	0.000768068	-2.30357
4930441J16Rik	570.651	2.35995e-06	2.92927e-05	-2.30344
Kif2c	29895.2	2.20502e-19	1.53333e-17	-2.30307
Naalad2	1386.17	3.85007e-12	1.20127e-10	-2.30282
Fxyd2	552.566	5.69984e-08	9.5969e-07	-2.30274
Gm20268	3267.84	4.69087e-14	1.88449e-12	-2.30224
1700029N11Rik	365.919	0.00010265	0.000844009	-2.29439
Lrrc74a	18067.5	4.40915e-16	2.24173e-14	-2.28906
Cpeb3	9551.62	1.38587e-14	5.95311e-13	-2.28838
Gm17019	603.439	2.38514e-07	3.60843e-06	-2.2857
Slc39a13	2910.19	5.36944e-15	2.42046e-13	-2.285
4933401H06Rik	1675.92	1.40135e-15	6.66588e-14	-2.28489
Chrna5	1171.84	6.99228e-11	1.84286e-09	-2.28484
Cntnap5c	221.158	2.51426e-05	0.000243071	-2.2837
4933431G14Rik	1828.79	1.6459e-16	8.9241e-15	-2.28325
1700023C21Rik	240.809	0.000133232	0.00106717	-2.28113
1700041M19Rik	1471	1.76452e-11	5.03912e-10	-2.27984
BC061195	3629.12	5.50435e-10	1.2797e-08	-2.2771
Kif26b	223.458	0.000697786	0.00446398	-2.27524
Otub2	35726.9	1.93375e-13	7.2257e-12	-2.27408
Actrt2	67235.1	5.24558e-13	1.8614e-11	-2.26866
Bzw1	22666.7	1.16897e-10	2.98637e-09	-2.26584
Dnajc5b	16392.4	5.23348e-12	1.61023e-10	-2.2608
Atad1	12311.3	1.33006e-23	1.23505e-21	-2.25471
Gm41289	464.73	3.90171e-06	4.60105e-05	-2.24969
Gm3404	556.5	1.95108e-08	3.54695e-07	-2.24884
Pkhd1l1	396.84	1.14514e-05	0.000119823	-2.24786
Mbd2	5905.82	1.92682e-16	1.02677e-14	-2.24638
Adcy2	344.518	0.00013751	0.00109128	-2.24373
4930528H21Rik	194.951	0.000297378	0.00214585	-2.24346
Nbr1	115133	5.26595e-18	3.25335e-16	-2.24199
4930422M22Rik	1097.98	8.30724e-08	1.35743e-06	-2.23909
Nckap1l	6659.92	6.1467e-32	9.43732e-30	-2.23686
Cdk16	16580.6	1.511e-17	8.87542e-16	-2.23625
Vsig1	11640.2	8.85457e-10	1.99575e-08	-2.2351
Ntm	408.44	4.12974e-06	4.8332e-05	-2.23303
Plpp6	4945.5	3.24863e-14	1.31876e-12	-2.23298
Chn2	26993.5	0.00015695	0.00122302	-2.23209
Tsga13	2345.02	3.49852e-12	1.09821e-10	-2.23081
Atp1a4	67478.6	1.5395e-18	9.98871e-17	-2.22597
Ace	67752.1	1.34175e-25	1.4251e-23	-2.22355
Pcdha2	6947.6	1.12179e-12	3.75716e-11	-2.223
Retreg1	12220.9	2.93053e-11	8.12947e-10	-2.22265
4930405D11Rik	228.486	0.00526827	0.0247561	-2.21804
Pde7b	116.421	0.00389181	0.0191649	-2.21704
Fam166a	13561	4.59418e-11	1.24549e-09	-2.21693
Tipin	3521.6	4.09684e-11	1.11651e-09	-2.20936
Tmem156	1244.18	2.93223e-13	1.06737e-11	-2.20426
Ankrd53	7576.35	2.85185e-21	2.30332e-19	-2.20406
Dlgap4	9558.68	2.83738e-10	6.91813e-09	-2.20393
Mppe1	532.166	3.32831e-09	6.81828e-08	-2.20242
Snai2	584.311	8.25544e-08	1.35039e-06	-2.20208
Sgms1	40675	4.84422e-24	4.69496e-22	-2.20014
Mylk3	144.37	0.00300906	0.0154505	-2.1981
4930594C11Rik	1585.56	2.86114e-15	1.31655e-13	-2.19736
Gm2491	522.009	1.51603e-05	0.000154461	-2.19705
1700039M10Rik	317.308	1.942e-05	0.000193414	-2.19651
Tbx15	201.273	0.00169021	0.0094964	-2.19395
Dct	391.824	1.88387e-05	0.000187866	-2.19179
Capza3	23209.8	1.00164e-07	1.6046e-06	-2.19059
Wwp2	14705.3	2.62777e-10	6.43741e-09	-2.18543
Pldi	2840.28	2.60576e-12	8.33146e-11	-2.18488
Gsdmd	645.952	2.88251e-05	0.000275735	-2.18452
1700066J03Rik	354.872	1.50121e-05	0.000153153	-2.18423
Gm5334	5094.51	1.0763e-08	2.05797e-07	-2.18077
Rbm4b	31854.4	8.17352e-11	2.12662e-09	-2.18037
Ube2j1	50740.9	4.39864e-19	2.94008e-17	-2.18023
Prss58	6064.61	3.56455e-07	5.19507e-06	-2.1789
Paqr9	16016	1.0381e-20	8.17147e-19	-2.17494
Gm2788	403.341	6.24127e-06	6.99808e-05	-2.1748
Klk1b5	116.556	0.0331035	0.105032	-2.17173
1700016C15Rik	3257.35	0.00191388	0.0105617	-2.17152
Znrf4	86265.3	5.68909e-11	1.51843e-09	-2.17097
Cpa6	471.993	1.06742e-05	0.00011291	-2.17052
Sh3rf2	18245.7	6.32356e-07	8.81037e-06	-2.16504
4933409F18Rik	1013.25	1.28424e-08	2.43455e-07	-2.16067
Myo7b	595.848	0.034175	0.107561	-2.1589
4930526L06Rik	129.467	0.00674092	0.0300378	-2.15648
Adam29	7122.66	4.8291e-11	1.30271e-09	-2.15632
Aktip	4429.6	7.73749e-29	9.99877e-27	-2.15355
Olfr127	174.826	0.00311528	0.0158858	-2.15127
Arl11	1424.6	9.16392e-13	3.11634e-11	-2.1498
1700013G24Rik	42868.1	1.09763e-14	4.76777e-13	-2.14978
Gpx6	1369.08	3.04611e-08	5.37995e-07	-2.14816
Cdv3	41412.3	4.14104e-20	3.07249e-18	-2.14694
Uba52	19555.7	1.67866e-14	7.09292e-13	-2.14639
4930505A04Rik	9763.36	3.60971e-11	9.92477e-10	-2.145
Gtsf2	7782.93	6.73925e-19	4.4282e-17	-2.14246
4921515E04Rik	239.61	0.000980898	0.00595567	-2.14181
Aif1	22120	7.79669e-13	2.70477e-11	-2.1412
Samt4	429.592	1.18813e-05	0.000123903	-2.13496
Vstm2a	534.454	8.48849e-06	9.21141e-05	-2.1347
4933406I18Rik	355.923	2.91319e-05	0.000277999	-2.13444
Llcfc1	25325.6	6.37081e-10	1.47012e-08	-2.13303
Plekhh2	14267.2	3.5514e-13	1.28372e-11	-2.12984
Zdhhc4	13362.6	4.27667e-21	3.43618e-19	-2.12926
Actl9	63065.7	1.6088e-11	4.63712e-10	-2.12913
LOC102631993	9918.08	3.00992e-06	3.6154e-05	-2.12702
Tle3	14585.7	8.51968e-14	3.33623e-12	-2.12527
1700017L05Rik	998.495	5.97024e-06	6.73798e-05	-2.12353
Gabarapl1	23314.9	1.56967e-18	1.0142e-16	-2.12328
Gstt4	37584.2	1.5992e-08	2.97704e-07	-2.12191
1700030L20Rik	382.451	2.52218e-05	0.000243685	-2.12163
Fam81b	10460	1.05333e-14	4.60112e-13	-2.11536
Spata6	108306	6.3377e-16	3.19087e-14	-2.11232
Chst2	218.342	0.00139165	0.00806744	-2.11145
Tex55	4810.01	2.86872e-06	3.46729e-05	-2.11137
1700092M07Rik	6670.8	1.77062e-10	4.4573e-09	-2.10821
Ophn1	2939.98	1.92839e-09	4.11894e-08	-2.10819
4930545E07Rik	119.889	0.0172978	0.0634896	-2.10699
Slc37a4	597.879	1.19809e-07	1.89386e-06	-2.10612
Nalcn	265.463	0.00193	0.0106318	-2.10576
1700019D03Rik	27711	2.42e-07	3.65403e-06	-2.10394
C2cd2l	1574.49	3.60297e-08	6.25659e-07	-2.1009
Psmd10	1843.53	1.50414e-14	6.4079e-13	-2.09928
Gm3402	844.422	4.85752e-08	8.27753e-07	-2.09786
Ppm1h	1710.53	1.65375e-13	6.23957e-12	-2.09596
Fam71f1	25340.2	1.71227e-08	3.16473e-07	-2.09522
Yod1	5863.3	2.09148e-15	9.73949e-14	-2.09379
BC048671	11346.1	9.12072e-16	4.5043e-14	-2.09234
Mkrn2os	141.966	0.0252066	0.0853818	-2.09222
Pcdhga4	532.729	0.000139398	0.00110344	-2.0907
Nipsnap3a	9043.12	2.1114e-14	8.77786e-13	-2.09002
Hmox2	82219.2	4.50825e-13	1.60711e-11	-2.08789
Nudt12os	501.66	1.55492e-06	2.0127e-05	-2.08687
Acot10	4460.71	8.20429e-23	7.22863e-21	-2.08685
AV039307	2077.39	2.71464e-16	1.42216e-14	-2.08376
Mageb5	1283.17	1.00191e-08	1.93242e-07	-2.08338
Gm11149	559.791	5.71594e-07	8.036e-06	-2.07831
1700095A21Rik	1139.29	9.88728e-06	0.000105594	-2.0779
1700120K04Rik	3320.45	8.20557e-08	1.34507e-06	-2.07774
Kcnn3	304.995	0.000119384	0.000969263	-2.07359
Cyb5r4	4532.61	2.55125e-20	1.93383e-18	-2.07312
Tssk2	72061	3.64879e-11	1.00145e-09	-2.07013
Lpin1	75819.4	2.78998e-17	1.62038e-15	-2.06669
Gm15104	938.919	0.000882015	0.00548853	-2.06063
Pgk2	168202	8.408e-08	1.37245e-06	-2.05403
Tex48	20112.3	3.34518e-07	4.89836e-06	-2.05344
Proca1	17417.9	2.1984e-09	4.6445e-08	-2.05305
1700015F17Rik	5913.83	9.68387e-12	2.8549e-10	-2.05273
Pxk	5562.26	3.50068e-11	9.6421e-10	-2.04874
Galntl5	40746.2	6.7232e-10	1.53771e-08	-2.04627
Lrrc26	144.365	0.0121138	0.0480801	-2.04569
1700095B10Rik	7064.55	5.74366e-09	1.14335e-07	-2.04517
Iqcf5	11953	6.67661e-07	9.26895e-06	-2.04376
Zfp457	328.382	0.00129389	0.00758292	-2.04249
Glipr1l1	10464.4	1.03171e-10	2.6532e-09	-2.03871
Iqcn	70206.7	1.92574e-08	3.50909e-07	-2.03849
Speer4b	1130.59	1.64667e-07	2.5586e-06	-2.0378
Arl13a	3569.54	2.73703e-06	3.32888e-05	-2.0363
Lyrm7	4111.69	1.58457e-14	6.71365e-13	-2.03389
Dydc1	4928.14	7.17251e-12	2.15969e-10	-2.03385
Lrrc51	34874.7	2.42065e-11	6.76342e-10	-2.03382
Sec23a	16920.9	3.47833e-09	7.11589e-08	-2.0299
Lpp	11376.6	1.1043e-10	2.83009e-09	-2.0287
Dok2	179.475	0.00230215	0.0123442	-2.02635
Ubqln3	58407.6	9.60477e-13	3.25199e-11	-2.02507
Trmt1	11384.9	8.87972e-39	2.18568e-36	-2.02402
Alg9	6857.74	2.6628e-30	3.72e-28	-2.02153
Scn3a	208.029	0.00207609	0.0113399	-2.02077
1700099I09Rik	1426.66	8.71038e-07	1.17967e-05	-2.01978
Akap12	327309	9.41406e-09	1.81798e-07	-2.01952
1700095J03Rik	4789.18	1.82332e-20	1.40668e-18	-2.01881
Grip1	19122.1	1.23682e-20	9.63788e-19	-2.01818
1700096K18Rik	940.155	4.8126e-09	9.64199e-08	-2.0168
Ncs1	3475.77	1.14208e-09	2.51209e-08	-2.01624
Gm33104	2945.59	4.55243e-18	2.82378e-16	-2.0153
Rpf2	2287.75	3.41439e-13	1.23708e-11	-2.01379
Ddi1	30622.5	4.06775e-12	1.2641e-10	-2.01173
1700012D16Rik	1130.5	0.000137399	0.00109106	-2.01161
Bmi1	16686.3	2.34395e-16	1.23632e-14	-2.01048
Serpina3b	135.424	0.0127983	0.0502311	-2.00939
Oser1	31797.9	5.48208e-25	5.66737e-23	-2.00884
Psmf1	30888.4	1.19042e-13	4.55798e-12	-2.00859
Gm11217	120.052	0.0330049	0.104814	-2.00691
Plac8	409.077	0.00153781	0.00879634	-2.00635
Camk2b	551.773	1.09056e-06	1.45537e-05	-2.00457
Il31	2656.29	4.36114e-16	2.22461e-14	-2.00424
1700120G07Rik	717.855	6.99889e-06	7.74674e-05	-2.00398
Gm6812	2902.43	0.000164193	0.00126961	-2.00348
Lmntd1	3219.27	2.47039e-21	2.01623e-19	-2.00318
Tuba1c	10976.2	3.45201e-10	8.31217e-09	-2.00278
Tex47	5082.06	2.45549e-10	6.04402e-09	-2.00057
Ccdc57	4199.51	4.14239e-06	4.84434e-05	-1.99989
Islr2	963.965	0.000417154	0.00286104	-1.99782
Lyzl1	8364.18	2.01814e-07	3.09854e-06	-1.9959
Suv39h2	6217.98	1.70042e-14	7.16533e-13	-1.99021
Eef1g	36613.9	1.64096e-16	8.9241e-15	-1.9884
Etohd2	1644.47	1.31865e-11	3.82927e-10	-1.98805
1700003F12Rik	53639	3.29823e-07	4.83418e-06	-1.9877
4930414N06Rik	2178.11	8.35105e-05	0.000709199	-1.98478
Gm20736	334.642	0.00162555	0.00918638	-1.98292
Fam209	10356.9	2.41577e-07	3.6512e-06	-1.98255
Ccsap	8571.91	1.06254e-06	1.42164e-05	-1.98083
Clic6	377.261	0.000294092	0.00212412	-1.97647
Vamp1	179.101	0.00427711	0.0208046	-1.97611
Morn3	16773.3	4.11859e-08	7.09632e-07	-1.97547
Stard10	70957.6	3.07705e-16	1.60549e-14	-1.97479
Sytl3	136.712	0.0220406	0.0768918	-1.97462
Gas5	446.93	3.20629e-05	0.000300968	-1.97334
Gpd2	51402.8	1.80416e-11	5.13321e-10	-1.97269
4930451I11Rik	1727.38	2.02696e-10	5.03719e-09	-1.97202
4930486I03Rik	929.811	0.000129656	0.00104229	-1.97165
Ccdc7a	5507.61	2.50254e-06	3.07747e-05	-1.97113
Spata45	6123.08	2.27459e-12	7.28762e-11	-1.96967
Rab28	6915.62	4.39791e-14	1.77139e-12	-1.96933
Bnipl	105.351	0.0202297	0.072132	-1.96768
Aldoart2	53608.1	9.88599e-13	3.33991e-11	-1.96613
Wdr38	3387.79	6.52688e-09	1.28769e-07	-1.9645
Smok4a	385.343	5.44842e-05	0.000483069	-1.96225
Rag2	149.335	0.0130317	0.050981	-1.96142
Gm6408	394.486	0.000325073	0.00231022	-1.96047
Gm16325	4707.93	1.65049e-15	7.75581e-14	-1.95914
BB019430	724.362	2.85784e-05	0.000273897	-1.95638
Srpk2	44950.7	2.34296e-14	9.66285e-13	-1.95537
Lrrc69	1794.44	3.05235e-05	0.000289321	-1.9544
H2al1n	2945.03	0.000307963	0.00221297	-1.95409
Necab1	125.299	0.00915283	0.0384747	-1.95113
Nrd1	115518	1.25729e-12	4.15709e-11	-1.95087
4930405J17Rik	279.114	0.00528578	0.0248308	-1.94994
Lypd8	159.054	0.00429197	0.0208704	-1.94973
Snhg10	221.155	0.000627534	0.00408529	-1.94697
Cobl	675.207	2.23706e-06	2.79985e-05	-1.94674
4933428G20Rik	2400.62	2.14023e-11	6.02332e-10	-1.9464
Gm5897	117.348	0.0275445	0.0911509	-1.9453
Klk1	204.419	0.0102152	0.0420849	-1.94237
Tent5c	92619.5	1.6522e-19	1.16458e-17	-1.94144
Chst10	199.327	0.015098	0.0573553	-1.94025
Gm20517	2438.66	0.000153781	0.00120075	-1.93743
Tex44	9586.5	3.16602e-08	5.56639e-07	-1.93645
Cfap97d1	4172.97	6.03105e-05	0.00052868	-1.93381
4930440C22Rik	340.592	0.00065769	0.00424596	-1.93324
Gm20611	1455.42	6.75932e-10	1.54369e-08	-1.93284
4930594M22Rik	249.047	0.00132789	0.00774991	-1.93237
Asb8	10162.9	1.06522e-08	2.04182e-07	-1.93037
Pde1b	791.251	7.90684e-08	1.30161e-06	-1.92929
Gm14625	277.192	0.000678514	0.00435863	-1.9279
Tlr9	142.228	0.00769722	0.0334438	-1.92781
Gcsam	111.341	0.0279257	0.0922549	-1.92637
Hoxa6	186.487	0.0071892	0.0316923	-1.9262
Kif17	56377.4	6.75399e-14	2.66558e-12	-1.9257
4430402I18Rik	25681	1.86472e-07	2.87438e-06	-1.92442
4930565N06Rik	574.215	2.17378e-05	0.00021416	-1.92254
Ttll10	29858.2	2.50513e-15	1.15961e-13	-1.92231
Samt2	717.112	2.44787e-06	3.01638e-05	-1.92136
1700123O12Rik	328.399	0.000361698	0.00253909	-1.92107
Iqcm	10918.5	1.41747e-15	6.72192e-14	-1.92101
Fgf14	1200.37	9.3006e-09	1.79831e-07	-1.92017
Tsks	47934	2.96064e-19	2.04047e-17	-1.91948
Fam205c	39568.4	5.43551e-10	1.26559e-08	-1.91887
Lhx1	264.94	0.00492621	0.0233969	-1.91738
Gm32865	365.158	0.00211995	0.0115388	-1.91686
Tepp	6815.9	1.35982e-06	1.78853e-05	-1.91668
4933404K08Rik	241.325	0.00242431	0.012894	-1.91647
Gm14486	134.011	0.0291042	0.0951747	-1.91477
Dhtkd1	567.869	3.55793e-07	5.1903e-06	-1.91455
AV205837	1275.23	4.25318e-08	7.28774e-07	-1.91379
Snhg16	649.776	2.7369e-06	3.32888e-05	-1.91321
Spam1	13884.3	1.07117e-17	6.43823e-16	-1.91311
Onecut3	100.427	0.0472281	0.137456	-1.91217
1700001L05Rik	49723.9	9.83335e-39	2.38259e-36	-1.90975
Gm7008	1077	2.7737e-08	4.94388e-07	-1.90972
Izumo2	8338.96	2.2309e-09	4.70675e-08	-1.9095
Sag	897.614	8.20866e-07	1.11659e-05	-1.90824
Fbxo44	6509.23	4.28308e-10	1.01558e-08	-1.90621
Izumo3	8851.14	1.82786e-06	2.34447e-05	-1.90578
Ndst3	2131.75	1.85282e-12	5.99828e-11	-1.90561
Eno1b	42706.8	5.72469e-07	8.04102e-06	-1.90548
Tuba4a	11145.4	4.65435e-09	9.37942e-08	-1.90544
Zfp991	5047.38	3.32353e-05	0.000310469	-1.90487
Slco6b1	8599.43	3.94916e-18	2.46934e-16	-1.90473
Ephx4	355.834	0.000365055	0.00255918	-1.90425
Aknad1	2565.41	7.4513e-08	1.2358e-06	-1.90409
Pkm	36698.1	3.52411e-27	4.14003e-25	-1.90405
Lrrc28	24499.3	4.76855e-15	2.16216e-13	-1.90277
A330076C08Rik	499.243	2.11886e-06	2.68003e-05	-1.90182
Usp44	29611.4	5.14294e-12	1.58552e-10	-1.89944
Tmco2	19528.4	2.95069e-05	0.000280887	-1.89858
Rp2	4087.15	4.02709e-09	8.18455e-08	-1.89725
Gjb3	259.602	0.000596886	0.00390874	-1.89696
Spn-ps	10132.8	2.79408e-13	1.02188e-11	-1.89606
Gm5538	195.041	0.00367714	0.0182469	-1.8954
Mlf1	66608.2	2.18961e-08	3.94817e-07	-1.89508
Chrna9	275.099	0.000722295	0.00460931	-1.89483
Stat4	49904.4	4.78862e-08	8.1691e-07	-1.89443
Gt(ROSA)26Sor	2199.17	7.19594e-08	1.19858e-06	-1.89278
Aqp11	70268.3	1.21746e-20	9.53492e-19	-1.89274
Gdpd1	15357.7	1.27942e-19	9.10092e-18	-1.89055
Samd4	43836	1.04999e-09	2.33269e-08	-1.89021
4930587E11Rik	286.657	0.0220256	0.0768566	-1.88916
Clba1	13125.9	9.02657e-11	2.33292e-09	-1.88889
Zc2hc1b	166.951	0.0416766	0.125401	-1.88571
Slc25a43	166.684	0.00841897	0.0359056	-1.88542
4833427G06Rik	4228.65	2.05791e-12	6.64632e-11	-1.88484
1700092C10Rik	487.316	0.000336034	0.00237398	-1.88381
Tcp11	335770	9.22905e-20	6.68761e-18	-1.88359
Gm5512	6499.32	1.49337e-06	1.94112e-05	-1.88277
Dnajb7	12133.1	7.65441e-08	1.26813e-06	-1.8823
Rmnd1	7000.32	1.1455e-08	2.18221e-07	-1.88127
Ntan1	1829.92	6.81206e-10	1.55345e-08	-1.87929
Gm5617	107486	2.25443e-07	3.42403e-06	-1.87899
B4galt2	4428.21	6.61675e-17	3.73113e-15	-1.878
Ilrun	11377.6	1.40392e-12	4.61242e-11	-1.87768
Efcab10	6760.65	1.63038e-11	4.68191e-10	-1.87706
Spata19	31388.6	0.00873249	0.037039	-1.87702
D030040B21Rik	178.86	0.0040406	0.0198033	-1.8751
Hook1	47063.4	5.27203e-14	2.10705e-12	-1.87467
1700065J11Rik	213.01	0.0313139	0.100932	-1.87318
4921534H16Rik	1434.56	5.20763e-10	1.21436e-08	-1.87311
Cep295nl	51508.8	2.27199e-11	6.36885e-10	-1.86997
Selenok	5861.77	6.63263e-19	4.37669e-17	-1.86947
Smok3b	721.415	7.67918e-05	0.000657906	-1.8692
4930563M21Rik	480.894	9.91149e-05	0.000820158	-1.86814
Pde1a	18263.2	2.11086e-13	7.84966e-12	-1.86806
F5	1615.08	0.00013736	0.00109106	-1.86716
1700061I17Rik	322.084	0.00334971	0.0168956	-1.86649
1700020N15Rik	3347.23	0.000254355	0.00187645	-1.86488
Tox3	196.99	0.00235889	0.0125962	-1.86483
4930556C24Rik	625.96	2.2146e-06	2.78178e-05	-1.86468
Spcs1	33633.9	5.02625e-25	5.23101e-23	-1.86448
Upk3bl	2525.01	0.0352834	0.110089	-1.86168
Lncbate3	225.619	0.00488011	0.0232206	-1.85981
Spa17	69746.3	1.32479e-09	2.88533e-08	-1.85959
Cmtm1	3377.44	5.04914e-09	1.00768e-07	-1.85657
Dyrk1b	56964.4	1.8074e-11	5.13321e-10	-1.85568
4930528P14Rik	277.642	0.00346748	0.0173845	-1.85442
4930546K05Rik	272.189	0.00189153	0.0104533	-1.853
Napb	202.549	0.00403236	0.0197691	-1.85256
Tm2d1	846.336	4.71442e-07	6.73792e-06	-1.85202
Mgat4d	7396.66	8.28252e-18	5.05658e-16	-1.85159
Pcdha12	751.513	0.000659199	0.00425394	-1.84982
LOC101055749	1950.14	0.0229834	0.0794479	-1.84949
Smok3c	398.18	4.15588e-05	0.000378644	-1.8471
4933404G15Rik	4172.31	8.41576e-14	3.30388e-12	-1.84638
Odf2	436000	6.75548e-14	2.66558e-12	-1.84632
Csrnp3	1983.63	1.48931e-14	6.36218e-13	-1.84603
Rnf44	19056.3	1.42697e-14	6.11273e-13	-1.84536
Spata7	50178.7	4.23517e-10	1.00728e-08	-1.84511
4933402J07Rik	17032.9	1.6041e-08	2.98258e-07	-1.84453
Mapk6	94268.4	8.27389e-16	4.12551e-14	-1.84429
Rexo1	15550.5	3.08529e-16	1.60549e-14	-1.84403
Cfhr1	389.912	0.000216394	0.00162657	-1.84391
Gm26689	929.689	1.66515e-05	0.000168328	-1.84355
Spanxn4	5791.14	0.000135061	0.00107958	-1.84188
Serinc2	548.143	2.88091e-06	3.47931e-05	-1.84075
4930503F20Rik	492.753	0.000389479	0.00270351	-1.84046
Irf2	1545.31	1.19688e-09	2.62147e-08	-1.83754
Tmem262	2412.36	2.87683e-12	9.1416e-11	-1.83586
Fer1l4	230.783	0.00233806	0.0125124	-1.83537
Dnaja4	24653.9	3.44597e-17	1.98649e-15	-1.83534
4930455B14Rik	2781.14	2.22797e-07	3.3905e-06	-1.83521
Ccdc33	14675.7	8.47515e-13	2.90761e-11	-1.83509
Fxr1	88163.5	1.16222e-11	3.38771e-10	-1.83317
Efcab9	12373.4	1.10704e-08	2.11155e-07	-1.83228
Insyn1	143.778	0.0159779	0.0599634	-1.83204
Gm11240	556.395	0.000207613	0.00156512	-1.83156
4933430H16Rik	379.133	0.000630881	0.00410364	-1.83091
Smok2b	311.947	0.00658023	0.0294402	-1.83075
4930524N10Rik	1548.75	6.75156e-07	9.35626e-06	-1.83021
D6Ertd474e	1926.63	2.0974e-07	3.21387e-06	-1.82992
1700026F02Rik	516	5.04104e-05	0.000451336	-1.82908
Vps26a	65353.5	2.69323e-32	4.35042e-30	-1.829
Pyroxd2	128.43	0.0446867	0.131766	-1.82618
Acsl5	2357.21	6.73922e-07	9.34751e-06	-1.82494
Gm15127	260.196	0.0401769	0.121803	-1.82358
Iqcf1	12775.2	0.000313216	0.0022424	-1.82184
Ankrd33b	257.076	0.00215448	0.0116857	-1.82172
1700030C14Rik	4731.04	4.03023e-12	1.25496e-10	-1.82157
Tmem37	671.759	0.000192929	0.00146655	-1.82037
Fam227a	3853.32	5.32065e-11	1.425e-09	-1.8201
Gm3383	134.935	0.046876	0.136636	-1.81882
4933400F21Rik	2363.88	2.21307e-06	2.78178e-05	-1.81807
4930558C23Rik	9283.12	9.84077e-08	1.57986e-06	-1.81759
Ppp1r42	7696.21	6.63882e-10	1.52516e-08	-1.81658
Glp2r	198.377	0.0118298	0.0471955	-1.81607
Zbbx	32869.3	1.36466e-06	1.79337e-05	-1.81514
Pdzd2	2478.61	7.82331e-08	1.29197e-06	-1.81089
Tmigd3	6820.89	0.000108754	0.000890417	-1.81009
Speer4e	807.955	5.38691e-05	0.000478984	-1.80928
Riiad1	9206.87	2.35723e-13	8.70324e-12	-1.80819
Eif1	44629.6	8.84989e-18	5.38177e-16	-1.80744
1700041C23Rik	1629.88	4.7042e-10	1.10695e-08	-1.80723
Sclt1	21437	1.79651e-15	8.41646e-14	-1.80502
Snhg12	141.444	0.0248575	0.0844393	-1.80404
Psma6	71028.2	3.39948e-06	4.04883e-05	-1.80256
Vars	58921.1	2.5458e-10	6.25638e-09	-1.80231
Grcc10	5265.1	3.22127e-08	5.6507e-07	-1.80154
Clk4	4076.6	2.15971e-11	6.06715e-10	-1.80148
Dpy30	9944.96	4.24074e-08	7.27447e-07	-1.80128
Hapln2	1187.36	8.15417e-05	0.000694	-1.80117
Sec11c	1353.58	1.25854e-08	2.39463e-07	-1.80099
Fam161a	24883.2	5.99488e-13	2.1176e-11	-1.80083
Fam217a	27226.2	1.81492e-09	3.89807e-08	-1.79886
4930579P08Rik	334.089	0.000566385	0.00373107	-1.79861
Ttc39d	43691.7	2.79128e-11	7.77099e-10	-1.79723
1700010D01Rik	6829.5	0.013816	0.0533879	-1.79666
Usp12	11975.4	4.67381e-07	6.68605e-06	-1.79651
Nexn	248.523	0.00657463	0.0294236	-1.79509
Gjc2	735.84	0.000164799	0.00127331	-1.79286
Etf1	21943.4	1.1579e-14	5.00157e-13	-1.792
Art1	1086.06	5.84281e-06	6.61347e-05	-1.79196
Pp2d1	11704.9	5.79516e-15	2.58978e-13	-1.79036
4930455C13Rik	1449.79	3.48704e-05	0.000324182	-1.78995
Dgkeos	4608.35	5.54107e-05	0.000490722	-1.78809
Tchh	383.32	0.00451419	0.0217938	-1.78638
Gm16973	2079.32	3.1864e-08	5.59587e-07	-1.78551
Snrpn	557.081	7.90869e-05	0.000674587	-1.78487
Neil3	889.802	4.22901e-05	0.000384629	-1.78408
Moap1	12471.4	8.55761e-12	2.54708e-10	-1.78219
Ppp1r2-ps3	4519.83	3.04564e-06	3.65265e-05	-1.77956
4932414J04Rik	120.586	0.0369199	0.114092	-1.77741
BC037704	2011.69	3.00091e-07	4.42349e-06	-1.77703
Cylc1	8061.1	5.04941e-05	0.000451825	-1.77635
Rnpepl1	5523.8	4.58761e-05	0.000414569	-1.7759
Prdx4	7201.26	0.0115116	0.0462462	-1.77548
Dnajb4	27791.9	5.53717e-12	1.70029e-10	-1.7728
Dnajb9	15099.4	1.23316e-26	1.37573e-24	-1.77173
Slc18a2	234.235	0.00479325	0.0229112	-1.77168
Ubr7	16730.1	1.55241e-11	4.49129e-10	-1.77167
Irgc1	200369	1.09433e-12	3.6731e-11	-1.77155
Trabd2b	271.754	0.00173599	0.0097114	-1.77004
Nemp1	20156.7	1.25357e-13	4.7762e-12	-1.76893
Zfand3	33091.5	9.7998e-11	2.52854e-09	-1.76373
Padi3	595.171	2.89123e-05	0.000276243	-1.76343
Tex13a	10082.6	0.000293937	0.00212399	-1.76307
Rhox3h	155.505	0.0210972	0.0744208	-1.76278
Entr1	42892.2	2.9543e-07	4.36724e-06	-1.76277
Usp50	14548.7	2.7632e-08	4.93083e-07	-1.76026
Nme8	25437.8	5.50995e-08	9.32626e-07	-1.75967
Prr27	15919.7	1.02354e-05	0.000108831	-1.75817
Dynll2	33335.7	9.82132e-18	5.92604e-16	-1.7575
Rho	290.633	0.000898872	0.00556913	-1.75714
Cntnap5b	5568.64	6.4885e-07	9.02396e-06	-1.75562
Speer4f1	914.78	0.000132055	0.00105937	-1.75525
Tomm22	35944.4	1.23936e-12	4.10659e-11	-1.75515
Nlrc5	312.755	0.000924524	0.00569229	-1.75471
Emx2	1098.77	4.30068e-07	6.20956e-06	-1.75444
Spata48	6790.21	2.81137e-07	4.18387e-06	-1.75413
1700064M15Rik	2208.36	9.66632e-08	1.55493e-06	-1.75405
Eva1a	161.879	0.0223296	0.0777177	-1.75254
Abhd5	21504.6	2.63324e-09	5.48102e-08	-1.75222
Gm10791	125.602	0.0336307	0.106301	-1.75197
Ropn1	29476	9.88154e-06	0.000105594	-1.75179
Col19a1	269.668	0.00463805	0.0222807	-1.7512
Hsdl2	18346.5	9.9365e-10	2.21888e-08	-1.75089
Txndc8	8046.16	0.000163967	0.00126941	-1.75078
Pnpla8	12749.3	5.68441e-12	1.73179e-10	-1.74889
Vwa3a	8063.58	3.84553e-07	5.56794e-06	-1.7485
Wnk2	142.716	0.0206213	0.0730982	-1.74845
4930583K01Rik	289.868	0.0092125	0.0386626	-1.74704
Fam3b	1707.9	0.000380683	0.00265196	-1.74699
Vmn1r181	123.421	0.0470932	0.137166	-1.74688
Frs3os	8203.26	1.05629e-09	2.34332e-08	-1.74657
Ell3	228.913	0.00579681	0.0266938	-1.7459
Trhde	599.856	6.87659e-05	0.00059497	-1.74485
Trim46	2852.68	6.33362e-06	7.09136e-05	-1.7448
Asb9	7224	1.99109e-05	0.000197542	-1.74348
Ifitm7	3486.67	1.84214e-07	2.8424e-06	-1.74283
Pvt1	663.052	0.000648835	0.00419914	-1.74225
Cib4	2341.6	6.19726e-05	0.000542367	-1.74223
Crisp2	244969	4.75576e-09	9.54044e-08	-1.74209
2410006H16Rik	1294.34	0.00188537	0.0104304	-1.74188
Pcsk6	827.178	0.000261619	0.00192636	-1.74163
4933408N05Rik	119.878	0.0436867	0.129556	-1.74113
1110059E24Rik	2472.3	3.91577e-11	1.07282e-09	-1.74022
C130074G19Rik	931.787	1.05808e-05	0.000111997	-1.7402
Cpa5	8595.37	1.96048e-15	9.15699e-14	-1.74017
Cd96	1230.91	0.00288805	0.0149279	-1.73708
Allc	52863.1	3.46613e-08	6.03246e-07	-1.73707
4930442L01Rik	7624.23	5.12813e-10	1.19762e-08	-1.737
4930511A02Rik	1526.45	2.51408e-06	3.08679e-05	-1.7369
Itgad	1940.03	0.000114168	0.000930323	-1.73651
Dpysl3	36101.8	2.95941e-08	5.24334e-07	-1.73627
Lamp5	184.606	0.0382272	0.117222	-1.73591
2610020C07Rik	261.699	0.00730571	0.0320934	-1.73521
Phlpp1	38865.6	1.00811e-05	0.000107368	-1.73499
1700008J07Rik	13012.5	2.62545e-18	1.65499e-16	-1.73464
Npas4	152.047	0.0347613	0.108898	-1.73356
Rasa3	7318.15	2.11174e-10	5.22276e-09	-1.73232
Evpl	641.43	0.000388005	0.00269449	-1.73104
1700017N19Rik	14066.2	2.80333e-06	3.39704e-05	-1.73049
1700028P15Rik	227.169	0.00908948	0.0382576	-1.73022
Ptp4a1	9151.09	1.4296e-05	0.000146522	-1.72957
Wbp2nl	5888.37	7.63211e-07	1.05014e-05	-1.72938
Stk35	41407.7	2.21759e-13	8.20719e-12	-1.72892
Grm4	146.506	0.0320518	0.102543	-1.7281
Klk1b16	152.151	0.0259133	0.0870343	-1.72787
Tmem60	6861.48	6.63917e-14	2.63309e-12	-1.72749
Lrrc9	34796.5	1.73056e-13	6.51356e-12	-1.72723
Faxc	531.254	0.000616265	0.00402376	-1.72686
Trim54	1152.23	0.00245086	0.0130156	-1.72616
Hoxd8	7491.92	4.78265e-19	3.16942e-17	-1.72575
1700020N18Rik	4379.29	1.79314e-05	0.000179511	-1.72536
Spata20	167477	1.99533e-10	4.99865e-09	-1.72455
1700025B11Rik	2872.9	0.000134518	0.0010758	-1.72341
Rgsl1	4543.88	4.37178e-11	1.18936e-09	-1.72333
Kcnip2	816.641	0.000868841	0.00542614	-1.72322
Stbd1	205.925	0.0332025	0.105226	-1.72266
Gm12925	471.925	0.00386167	0.0190528	-1.72246
Tmem246	4924.19	1.07903e-13	4.17269e-12	-1.7202
Ift57	7733.3	1.35028e-16	7.45152e-15	-1.71967
Eva1c	3427.22	8.63239e-06	9.3349e-05	-1.71809
4930506A18Rik	490.137	0.000112516	0.000917822	-1.71778
Hey1	931.883	9.93456e-05	0.00082119	-1.71723
Dnajb3	104584	3.21552e-12	1.01142e-10	-1.71608
4931408C20Rik	1500.48	3.51683e-06	4.17445e-05	-1.71388
Cypt12	23945.2	0.0144981	0.0555739	-1.7112
Spns1	2450.12	1.50203e-06	1.94912e-05	-1.71066
Efcab7	2151.71	3.02418e-05	0.000287001	-1.71034
Tex45	3658.79	0.000649084	0.00419914	-1.70969
4930554I06Rik	345.17	0.00270932	0.0141603	-1.70893
Mpp6	16803.2	5.85956e-12	1.77817e-10	-1.70842
Ccdc117	19759.8	8.15766e-13	2.8049e-11	-1.70835
1700022A21Rik	21084.7	3.01106e-09	6.22566e-08	-1.70698
Smap1	30749.5	2.43688e-10	6.0173e-09	-1.70638
Nudcd2	2916.62	1.64253e-10	4.15509e-09	-1.70577
4930500F04Rik	186.125	0.035144	0.109808	-1.70392
Mturn	3938.46	2.53092e-09	5.28935e-08	-1.70382
Clip4	59723.5	7.17512e-11	1.88265e-09	-1.70327
Lypla1	10064.9	0.000153933	0.00120133	-1.70248
Dmrt3	468.573	0.00113617	0.00677899	-1.70153
Fam220a	37013.1	1.00483e-12	3.38738e-11	-1.70046
Gm3519	844.269	5.59769e-05	0.00049517	-1.69956
Slc44a3	253.737	0.0105051	0.043005	-1.69935
Plekha3	3850.23	1.07034e-05	0.000113064	-1.69911
Cylc2	8648.94	1.11705e-06	1.48944e-05	-1.699
Gm11213	2949.9	1.19442e-05	0.000124392	-1.69847
4930584F24Rik	2360.4	0.00358261	0.0178568	-1.69783
2810408I11Rik	8948.13	3.09417e-09	6.38049e-08	-1.69627
4933412E12Rik	3205.64	2.04931e-08	3.71679e-07	-1.69589
Gm44505	962.137	0.00245314	0.0130199	-1.69585
1700001G01Rik	503.661	0.000714778	0.0045651	-1.69568
1700001C02Rik	8909.87	1.87284e-06	2.39622e-05	-1.69563
Cdhr2	157.101	0.0237918	0.0815517	-1.69532
Bpifb3	207.655	0.00742618	0.0324874	-1.69455
Sgf29	18009.9	9.86941e-06	0.000105548	-1.69418
9530002B09Rik	513.643	0.000462983	0.00313241	-1.69416
Tigd5	675.8	9.13818e-05	0.00076515	-1.69274
Cdrt4os1	174.101	0.0322905	0.103054	-1.69249
4930440I19Rik	343.512	0.00658219	0.0294404	-1.69211
Speer9-ps1	198.481	0.0315413	0.101539	-1.68995
1700008K24Rik	60725.1	3.20659e-12	1.01066e-10	-1.68952
Micos13	11098	5.07448e-07	7.22589e-06	-1.68922
Zfp85os	594.477	0.000127496	0.00102735	-1.68895
Ms4a13	21969.6	1.11481e-07	1.77306e-06	-1.68886
Osmr	227.476	0.0201031	0.071771	-1.6881
4930477N07Rik	305.622	0.00867041	0.0368201	-1.68794
Cep112	10749.7	1.23256e-06	1.63361e-05	-1.68764
B830017H08Rik	275.635	0.00555697	0.0258077	-1.68687
Mfap5	478.663	0.0133034	0.051797	-1.68583
4932412D23Rik	1878.33	6.41045e-06	7.16704e-05	-1.68444
Sorbs3	11217.5	9.37656e-12	2.77485e-10	-1.68383
Rnf212b	478.826	0.000930825	0.00571484	-1.68337
Gm44504	1002.44	0.000759023	0.00481398	-1.68333
Pwwp2b	59139.2	2.0118e-09	4.28529e-08	-1.68332
Gm9999	5927.98	0.000138888	0.00109997	-1.68232
Phactr1	1424.11	0.00029183	0.00211073	-1.68196
Tex24	1828.88	7.802e-08	1.28982e-06	-1.68037
4930529K09Rik	334.652	0.00578346	0.0266475	-1.67845
A930006K02Rik	647.865	0.00122283	0.00722103	-1.67775
Glul	44838.7	1.24093e-06	1.6419e-05	-1.67774
Dact3	1880.65	1.01373e-05	0.000107892	-1.67746
Syt3	184.439	0.0269153	0.0896426	-1.67562
Muc1	2500.22	5.84883e-07	8.20795e-06	-1.67191
4933415F23Rik	75625.9	1.38231e-08	2.59196e-07	-1.67131
Lmo2	291.711	0.0122544	0.0484858	-1.67107
4921539E11Rik	11920.2	1.85698e-06	2.37788e-05	-1.67083
1700084M14Rik	3144.37	0.031479	0.101359	-1.67073
1700025M24Rik	1420.08	1.32119e-05	0.000136221	-1.66973
Vps50	2511.33	1.08664e-07	1.73003e-06	-1.6694
Epb41l4aos	256.12	0.00864792	0.0367507	-1.66794
Paip2	20049.5	1.55602e-09	3.35129e-08	-1.66711
0610040B10Rik	397.197	0.00790033	0.0341065	-1.6666
Spaca9	16263.9	0.000428615	0.00292798	-1.66503
4930453N24Rik	101338	2.53052e-07	3.81049e-06	-1.66499
F11	180.553	0.0203149	0.0722697	-1.66462
Cabyr	51027.4	4.02348e-10	9.59878e-09	-1.66405
Carhsp1	15305	3.04902e-07	4.48588e-06	-1.66386
Timm21	1336	1.04934e-06	1.4064e-05	-1.66342
Ndufaf1	1998.83	1.3253e-08	2.50321e-07	-1.66246
BC024978	2456	7.46429e-10	1.69223e-08	-1.66187
4931440J10Rik	819.511	0.00161447	0.00914045	-1.66155
Eif1ax	6637.81	9.82163e-05	0.000814025	-1.66067
4930513D17Rik	521.55	0.00106071	0.00638774	-1.65948
Npb	434.159	0.00169619	0.00952653	-1.65918
Srp54c	5709.03	0.0295536	0.09636	-1.65918
Akap14	2633.08	3.00239e-08	5.30879e-07	-1.65914
Gm6890	874.219	9.43356e-05	0.00078564	-1.65827
Upp2	461.398	0.00791271	0.0341314	-1.65775
Atp5mpl	4329.49	0.00041047	0.0028277	-1.65761
4930572O13Rik	658.743	0.0050408	0.0238316	-1.65733
Sema4g	460.968	0.000522466	0.0034772	-1.65694
4930592I03Rik	1802.79	1.20734e-05	0.000125484	-1.65594
Tpgs2	28706	2.35397e-09	4.95293e-08	-1.65454
Odf4	21052.3	1.14628e-13	4.41075e-12	-1.65342
Otulinl	337.252	0.0101816	0.042002	-1.6531
Lemd1	4895.25	2.41166e-05	0.000234174	-1.65285
Cep57l1	5767.07	2.67681e-06	3.26331e-05	-1.64987
Postn	532.326	0.00281662	0.0146372	-1.64973
1700102H20Rik	343.563	0.0050399	0.0238316	-1.64909
Alox15	205.496	0.023755	0.0814616	-1.64883
Adam30	17122.1	5.06753e-14	2.03055e-12	-1.64811
Cplx1	156.741	0.0408673	0.123486	-1.64769
Sgip1	949.554	0.0037733	0.0186881	-1.64737
Gm5941	5593.08	0.00275223	0.0143479	-1.64716
Bhmt2	139.833	0.0396628	0.120598	-1.64701
Aamdc	2131.56	7.22229e-08	1.20167e-06	-1.64686
Asb5	275.262	0.0291034	0.0951747	-1.64646
Cd274	346.195	0.00549305	0.0255951	-1.64541
Mms19	2606.82	1.31724e-06	1.73694e-05	-1.64525
4933430N04Rik	273.142	0.0472784	0.137542	-1.64468
Nmbr	1024.54	0.000571302	0.00375477	-1.64418
Ccdc136	225510	7.95462e-08	1.30808e-06	-1.6433
Adam34	3342.1	7.06712e-06	7.81111e-05	-1.64221
Ccdc28a	7396.64	6.34224e-05	0.000553768	-1.64183
Srek1ip1	2037.46	7.06351e-07	9.745e-06	-1.64063
Tmem270	7833.26	2.64615e-08	4.74929e-07	-1.64062
Six2	1138.19	0.00335997	0.0169224	-1.64038
Hecw1	3735.06	1.15337e-06	1.5339e-05	-1.64
Znrd1	3424.77	1.36832e-09	2.97178e-08	-1.63994
Nr6a1	30998	7.24047e-09	1.42124e-07	-1.63936
Kctd16	4364.68	0.00566424	0.026196	-1.63933
Pcdhgc5	1108.9	2.03136e-05	0.000201023	-1.63913
Bmp7	432.171	0.00596197	0.0273204	-1.63882
Glt1d1	6404.59	9.24515e-08	1.49338e-06	-1.63873
Ufd1	9668.71	1.49866e-06	1.94637e-05	-1.63856
Gm1141	12170.8	1.7133e-12	5.5582e-11	-1.63819
Npas3	393.461	0.0174237	0.0638516	-1.63788
Ppp1r36	20347.5	4.28314e-12	1.32837e-10	-1.63696
4930405A21Rik	200.65	0.0290938	0.0951747	-1.63636
Atp6v1fnb	874.17	0.000932152	0.00572017	-1.636
Dsg1a	7623.69	1.40218e-06	1.83646e-05	-1.63491
4930415O20Rik	6125.97	3.25375e-05	0.000304869	-1.6348
4930558F17Rik	3330.11	0.000199106	0.00150832	-1.63448
Ergic2	18212.3	1.66039e-07	2.57734e-06	-1.63395
Jmjd6	10835.3	1.26979e-09	2.77332e-08	-1.6336
Dnajb14	28006.2	1.66496e-10	4.20497e-09	-1.633
Zfpm2	1764.29	5.78609e-06	6.5829e-05	-1.63203
1700030N03Rik	484.975	0.0038098	0.0188404	-1.63185
Cttnbp2	183.088	0.0193918	0.0696729	-1.63185
Adam1a	40196.8	3.43296e-14	1.38994e-12	-1.63174
Shcbp1	6136.9	3.26915e-10	7.91543e-09	-1.63161
Tsacc	18390.8	1.1622e-05	0.000121525	-1.63148
Eif4e	19404.1	5.03836e-08	8.57627e-07	-1.6314
Serpina3a	1715.39	0.000552285	0.0036421	-1.63117
1700034J05Rik	39017.1	4.65735e-09	9.37942e-08	-1.63071
Cdc14b	11532.5	5.64082e-12	1.72189e-10	-1.63008
Rmdn2	20201.8	1.79884e-08	3.30896e-07	-1.62911
4933424G06Rik	4596.03	2.33143e-05	0.000227381	-1.62883
Vwa3b	26564	1.84401e-10	4.63454e-09	-1.62705
Synpo2	210.611	0.0398276	0.120924	-1.62676
4933433G08Rik	882.092	0.000152676	0.00119513	-1.62651
Gm9839	512.71	0.00681149	0.0303087	-1.6263
Cenpk	1475.38	0.00151097	0.00867157	-1.62564
Prdm6	224.401	0.025194	0.0853579	-1.62441
Tbc1d22bos	897.051	0.0102094	0.0420719	-1.62421
Atxn3	12356.2	4.10858e-08	7.08696e-07	-1.62413
1700100L14Rik	1556.69	0.00122534	0.00723313	-1.62374
Irf4	239.777	0.0281358	0.0927909	-1.62344
Tfb1m	5681.85	1.63153e-12	5.30402e-11	-1.6232
Zfyve1	20103.5	4.91914e-13	1.74957e-11	-1.62271
1700030O20Rik	1130.11	9.09386e-06	9.78615e-05	-1.62238
Ubl3	30842.8	9.09319e-13	3.09908e-11	-1.62179
Abhd16b	8368.55	9.9261e-05	0.000820928	-1.62166
Pole2	367.161	0.00774811	0.0335802	-1.6213
Dda1	10323.6	1.04033e-07	1.66485e-06	-1.62096
3830403N18Rik	257.047	0.0496031	0.142361	-1.62085
1700073E17Rik	4893.38	0.000118998	0.000966629	-1.6208
Srxn1	3661.71	9.94827e-06	0.000106172	-1.62064
Pmis2	5859.89	1.67523e-05	0.000168907	-1.62055
Gm19723	2426.21	0.00355013	0.017713	-1.6204
4930539J05Rik	2110.47	2.94431e-05	0.000280623	-1.6199
1700109G14Rik	4616.09	0.000478836	0.00321721	-1.61854
Hsfy2	10792.9	8.75341e-09	1.69886e-07	-1.61848
4930467J12Rik	787.61	0.0059259	0.0271872	-1.61816
Pcdh7	422.336	0.00551624	0.0256502	-1.61774
4921531C22Rik	5284.73	2.12481e-07	3.25265e-06	-1.61753
1700017D01Rik	29603.5	1.97993e-07	3.04592e-06	-1.61737
1700012D01Rik	1587.35	4.35682e-05	0.000395095	-1.61721
Gata3	228.005	0.0258432	0.0869118	-1.61701
St8sia5	406.619	0.00351851	0.0175778	-1.61693
9130023H24Rik	1649.11	0.000468139	0.00315902	-1.61625
Ssxb3	182.829	0.0418206	0.125729	-1.61614
Mllt11	26323.9	1.0529e-11	3.09231e-10	-1.61602
Rab10os	834.245	1.25439e-05	0.000130026	-1.61565
D630003M21Rik	534.608	0.0017314	0.00968922	-1.61482
Ube2n	25291	5.5091e-07	7.77759e-06	-1.61462
Lrrc1	24446.7	3.03166e-10	7.36863e-09	-1.61446
Kctd9	10546.8	1.23807e-12	4.10659e-11	-1.61361
Phkg2	141363	4.99482e-10	1.17001e-08	-1.61334
Gm11981	2060.26	0.000648051	0.00419772	-1.61288
Crybg1	522.655	0.00213876	0.0116127	-1.6125
Prss40	6910.53	2.03452e-06	2.59026e-05	-1.61226
1700031L13Rik	4304.29	1.57507e-05	0.000159638	-1.61202
1600020E01Rik	552.206	0.0168109	0.0622017	-1.61136
5430416N02Rik	268.228	0.0293881	0.0959616	-1.61135
Ceacam20	266.216	0.0199479	0.0713074	-1.61099
Oip5os1	2708.96	1.82266e-08	3.3409e-07	-1.61021
Trim17	26088.4	8.46557e-08	1.3804e-06	-1.61
Erich3	27651.8	1.02697e-10	2.64538e-09	-1.60933
Spata21	134911	8.05595e-12	2.41165e-10	-1.60863
Cacybp	8058.6	2.49109e-08	4.48135e-07	-1.60861
Irak4	857.218	1.07779e-05	0.000113692	-1.60706
Zdhhc19	7649.88	2.65768e-07	3.97805e-06	-1.60701
Deup1	26374.7	8.91137e-13	3.05052e-11	-1.6069
5430402O13Rik	445.412	0.00622425	0.0282221	-1.60673
Mea1	93727.6	9.64516e-10	2.16138e-08	-1.60641
Asb1	11021.4	3.4046e-11	9.39415e-10	-1.60359
Vmn2r7	804.901	0.00063472	0.00412169	-1.60348
Ankrd45	7409.5	1.16086e-12	3.87019e-11	-1.60312
Slc35a3	5812.77	2.09271e-11	5.9003e-10	-1.6029
Map2k7	25132.3	5.34262e-13	1.89151e-11	-1.60246
Pebp1	252342	9.80318e-12	2.88459e-10	-1.60179
Gm5415	1843.34	0.000883282	0.00549421	-1.60155
4930563J15Rik	1571.65	0.000134322	0.00107478	-1.6014
1700071M16Rik	2106.32	1.2657e-05	0.000130848	-1.60129
Dmac2l	5261.22	1.48521e-06	1.93214e-05	-1.59987
1700108F19Rik	1384.87	0.000407493	0.00281219	-1.59974
Rtkn	976.064	0.000219084	0.0016452	-1.59882
Slc35a5	7836.22	1.551e-05	0.000157611	-1.59774
Ripor2	621.036	0.000248911	0.00184153	-1.59682
Lsm2	15541.9	4.01311e-10	9.58881e-09	-1.5967
3830406C13Rik	10232.4	1.8618e-13	6.99053e-12	-1.59557
Aox4	364.435	0.00621677	0.0282212	-1.59544
Prss52	4507.66	0.00180286	0.0100312	-1.59521
Sirpb1c	731.664	0.0137701	0.05325	-1.59515
Tgfbr3l	313.166	0.00692849	0.0307411	-1.59512
1700057G04Rik	6593.38	0.000490558	0.003288	-1.59501
Vsig10l	363.759	0.0146932	0.0561756	-1.59467
1700122C19Rik	1763.48	3.55334e-05	0.000329358	-1.59426
Gstm5	277294	0.000319514	0.00227908	-1.59397
0610009L18Rik	9199.78	7.58418e-06	8.31739e-05	-1.59378
Necab2	1452.97	4.44478e-07	6.39973e-06	-1.59329
Pex11b	11159.6	1.28299e-15	6.12164e-14	-1.59324
Atg9a	60228.6	1.89667e-09	4.06238e-08	-1.59312
Nfkbib	12368.7	4.45591e-15	2.03229e-13	-1.593
Cnr1	540.52	0.00787888	0.0340234	-1.59276
Rffl	22304	3.4454e-16	1.78093e-14	-1.59249
Pgap2	5199.72	4.59596e-07	6.59819e-06	-1.5917
Slc22a16	50548.2	2.01246e-10	5.01724e-09	-1.59168
Serhl	546.449	0.00106045	0.00638774	-1.59167
4930519H02Rik	455.056	0.00817732	0.0350389	-1.59166
Tiprl	10516.6	9.23447e-12	2.74328e-10	-1.59065
4930426L09Rik	392.682	0.00480186	0.0229327	-1.59052
Col9a1	332.076	0.0166188	0.061741	-1.59046
Slamf1	179.121	0.035242	0.110005	-1.59041
Dnmt3l	1404.59	2.24816e-05	0.000220507	-1.59001
Tmem51	279.584	0.0105992	0.0432419	-1.58958
Pcolce2	188.406	0.0477924	0.138708	-1.5894
Lat2	580.855	0.0041924	0.0204503	-1.58916
Gm35206	177.674	0.0311275	0.100477	-1.58731
Prkch	464.683	0.00220682	0.0119155	-1.587
Mfsd9	1744.26	5.27598e-05	0.000470199	-1.58632
R3hcc1	12649.3	4.29769e-12	1.33022e-10	-1.5862
Gtf2a2	14743.7	5.1263e-06	5.92351e-05	-1.58583
Gldc	864.376	0.00119476	0.0070714	-1.58511
1700007J10Rik	467.105	0.00557887	0.0258862	-1.58389
Slco6d1	12816.1	4.83045e-11	1.30271e-09	-1.58342
Itgae	11301.4	1.07215e-05	0.000113178	-1.58239
Ydjc	2569.23	3.56672e-06	4.2264e-05	-1.58102
Nfatc1	339.114	0.0104154	0.0427166	-1.58092
Fam83e	8846.44	2.16639e-06	2.73568e-05	-1.58048
Gm4925	1163.96	6.0816e-06	6.83882e-05	-1.58038
Gm6460	243.365	0.0223525	0.0777524	-1.57989
1700003E16Rik	107053	3.21234e-09	6.60659e-08	-1.57922
Cdkl3	43182.9	5.55503e-08	9.38365e-07	-1.57856
Cdyl	27912.1	1.68852e-08	3.12457e-07	-1.57845
Gpank1	10169.1	2.05303e-08	3.71919e-07	-1.57828
Coq10b	3077.59	0.000101229	0.000835408	-1.57788
Zdhhc25	9815.52	3.11798e-09	6.42106e-08	-1.57754
Slc9b1	22523.9	3.11631e-12	9.86217e-11	-1.57689
1700030M09Rik	1452.39	4.83827e-05	0.000435192	-1.5763
Fam24a	1813.95	0.000115867	0.000943178	-1.5763
Btg1	21987.4	1.09052e-18	7.13531e-17	-1.5758
Prss39	52230.9	4.59228e-11	1.24549e-09	-1.57572
1700010B08Rik	19075.4	3.88495e-13	1.39777e-11	-1.57519
Gm12440	428.633	0.0393052	0.11984	-1.57452
Ankrd60	24816.3	1.93109e-09	4.11904e-08	-1.57416
Gm525	460.494	0.0182761	0.0663095	-1.57312
4930591A17Rik	602.388	0.000616897	0.00402449	-1.57264
Map3k5	947.314	0.000631694	0.0041072	-1.57235
Gmpr	525.094	0.00039696	0.00275052	-1.56996
Gramd3	1590.31	3.55995e-05	0.000329719	-1.5699
M1ap	9574.71	0.000477181	0.00320813	-1.56969
Eif4h	25614.6	6.66635e-10	1.52922e-08	-1.56965
Jakmip2	504.101	0.0182237	0.0661816	-1.56947
Gsg1l	209.342	0.0238574	0.08174	-1.56881
Cystm1	6874.32	0.00137539	0.00798509	-1.56842
A630023A22Rik	717.296	0.00338502	0.0170206	-1.56826
1700061F12Rik	4119.72	0.00441946	0.0214031	-1.56813
Kifap3	39864.1	8.26382e-11	2.14652e-09	-1.56727
Trp53rkb	1314.99	4.47402e-05	0.000405013	-1.56636
Emilin2	2456.19	0.000356967	0.00251056	-1.5663
Nup35	6100.09	5.8468e-09	1.16239e-07	-1.56566
Cst13	4769.89	0.000591343	0.00387572	-1.56537
BC048507	3796.73	0.000218919	0.00164476	-1.56473
1700011L22Rik	14934.2	1.81096e-05	0.000181061	-1.56428
Atp2b2	179.955	0.0454581	0.133511	-1.56413
1700128A07Rik	710.883	0.00797511	0.0343719	-1.5639
Ppa2	8883.12	1.06823e-05	0.000112918	-1.56295
Arfgap2	14169.6	1.3762e-09	2.98472e-08	-1.5625
Speer4c	1217	0.0313614	0.101018	-1.56238
Sell	332.103	0.0260547	0.0874525	-1.56216
Arl4c	2015.97	5.65211e-05	0.00049913	-1.56214
Spcs2	11608.8	1.76107e-11	5.03854e-10	-1.56176
4921511C20Rik	1585.68	3.66717e-05	0.000338493	-1.56166
Prdm16	652.549	0.00125793	0.0073973	-1.56109
Gm16835	8960.46	5.20286e-08	8.83688e-07	-1.56102
Snhg17	459.104	0.00624858	0.0282993	-1.56099
Mtfr1	45432.2	1.03806e-05	0.000110179	-1.56092
Eif4g1	40409	8.95677e-10	2.01586e-08	-1.56065
Piga	2630.93	3.86338e-10	9.24528e-09	-1.55994
Cdkl2	28638.5	9.07301e-13	3.09901e-11	-1.55991
Fdxacb1	1226.92	4.05878e-05	0.000370669	-1.55967
Zcchc13	6368.46	0.0024779	0.0131143	-1.55903
4930486F22Rik	325.063	0.0315854	0.101649	-1.55751
Kcnmb4os1	8518.19	4.65299e-05	0.000420233	-1.55654
4930515B02Rik	335.142	0.038739	0.118477	-1.55636
Prss54	13137.2	1.76282e-06	2.26855e-05	-1.55606
Amz2	47801.3	3.70035e-07	5.37279e-06	-1.556
Arhgef25	1223.38	2.29657e-05	0.000224546	-1.55589
Cpsf4l	3779.7	4.07142e-05	0.000371604	-1.55584
Sh3kbp1	3170.72	0.000840758	0.0052656	-1.55554
1700012B07Rik	16411.8	0.00015184	0.00118919	-1.55535
Sik1	3966.43	5.65719e-06	6.46948e-05	-1.5549
Gm5142	11533.8	1.85423e-08	3.39076e-07	-1.55421
Dbndd2	750.842	0.00178141	0.00992611	-1.55373
Cript	9927.28	4.61387e-07	6.6125e-06	-1.5533
Cdc34	32429.8	2.30619e-05	0.000225344	-1.55303
5730403I07Rik	1079.44	0.000431879	0.00294769	-1.55262
Mbd3l1	7309.19	0.000128592	0.00103481	-1.55253
1700029J07Rik	7790.73	9.31659e-16	4.58642e-14	-1.55235
Dcaf1	19480.1	1.81115e-08	3.32767e-07	-1.55181
Gpr61	422.613	0.0194661	0.0698754	-1.55178
Cldnd2	3055.99	0.000137412	0.00109106	-1.55013
Hils1	67334.3	0.00205679	0.0112463	-1.54982
Hax1	6104.49	8.23424e-08	1.34835e-06	-1.54974
Zfp474	16903.8	3.6442e-06	4.3054e-05	-1.54899
Rab3il1	52812	2.07984e-06	2.63929e-05	-1.54847
Antxrl	9719.89	2.6707e-07	3.99369e-06	-1.54843
Zfp982	1180.67	0.0213198	0.0749675	-1.54835
Gm6880	934.537	0.000238979	0.0017808	-1.54774
Gm4787	22878.2	2.70233e-07	4.03709e-06	-1.54742
Il1rap	454.182	0.00209754	0.0114343	-1.54732
Theg	26999.6	1.19594e-05	0.000124466	-1.54706
Dusp12	553.95	0.00942634	0.0393906	-1.54704
Gpr179	659.541	0.00655306	0.029344	-1.54695
Scube2	2061.52	0.000197554	0.00149876	-1.54687
Pigg	3460.85	0.000104252	0.000854906	-1.54666
Pmvk	979.357	0.000490857	0.003288	-1.54638
Alg8	3467.33	2.9194e-11	8.11311e-10	-1.54627
Kcnip4	673.803	0.00213483	0.0115954	-1.54621
Palm2	426.947	0.00215444	0.0116857	-1.54511
4930558K02Rik	1288.19	2.94016e-05	0.000280401	-1.54463
Gm21190	748.933	0.00422604	0.0205761	-1.54359
Fsip1	12556.3	1.06363e-14	4.63307e-13	-1.54344
Adam26a	14916.2	2.01666e-06	2.56963e-05	-1.54338
Tmem64	11543.4	2.4208e-09	5.07975e-08	-1.54338
Lrrc34	46212.4	5.51504e-08	9.32626e-07	-1.5433
Alas2	1324	0.00292851	0.0150922	-1.54242
1700063H04Rik	1155.8	9.88165e-05	0.000818124	-1.54212
1700016D06Rik	4349.16	0.00369399	0.0183246	-1.54183
Thsd1	480.084	0.00126857	0.00745356	-1.54164
Gsdmcl-ps	4540.73	0.000118392	0.000962216	-1.54128
Ak5	304.165	0.0195029	0.0699774	-1.54059
Rpgr	7568.99	2.27579e-06	2.83916e-05	-1.5403
Adam21	9236.13	1.30629e-06	1.72398e-05	-1.53981
Rad23b	55191	1.54425e-09	3.33056e-08	-1.53955
Tmem247	33491.2	0.00203916	0.0111736	-1.53901
Ddit4l	2995.4	2.16155e-07	3.29914e-06	-1.53894
Ubxn11	36531.4	9.56765e-08	1.54066e-06	-1.53836
4930423M02Rik	1028.18	0.000549773	0.00362935	-1.5383
Fbxo2	1411.92	0.000755919	0.00479625	-1.53793
Hist1h3a	610.123	0.0331073	0.105032	-1.53764
4930448K20Rik	2756.94	0.0134506	0.0521577	-1.53757
Pom121l12	16564	1.44508e-09	3.12535e-08	-1.53745
Ube4bos3	1536.02	5.48511e-06	6.29124e-05	-1.5373
Wscd2	524.531	0.00787632	0.0340217	-1.53709
Ap3s1	7652.89	7.19982e-05	0.000619233	-1.53656
Fat4	1021.44	0.00281831	0.014641	-1.53593
1700125H03Rik	1523.55	0.0172175	0.0633131	-1.53497
Rfx3	5439.59	3.68807e-09	7.52511e-08	-1.53488
Trp53tg5	5739.64	0.00639369	0.0287847	-1.53473
Glcci1	15803.6	7.25892e-08	1.20647e-06	-1.53337
Gpx4	112076	0.000117121	0.000952884	-1.53258
Mapk11	424.669	0.0120004	0.0477646	-1.53187
Amn1	15333.6	2.67512e-08	4.79574e-07	-1.53147
Fam205a1	7178.79	0.00171055	0.00959332	-1.53071
Tmem190	8204.91	0.000529547	0.00351527	-1.53063
Sec61a2	6011.31	5.60311e-08	9.45456e-07	-1.5306
Sucla2	64813.4	6.27933e-11	1.66736e-09	-1.52981
Ulk2	33796.9	1.8625e-08	3.40187e-07	-1.52923
Rnpep	6242.05	8.95255e-07	1.2093e-05	-1.52917
Ngly1	38846.8	3.53462e-10	8.49788e-09	-1.52917
Ly6m	1205.4	0.00209308	0.0114166	-1.52888
1700001L19Rik	15169.6	9.71863e-07	1.30708e-05	-1.52825
Nup98	92130.4	0.000249416	0.00184439	-1.52777
Tescl	15007.9	3.95049e-06	4.65503e-05	-1.52775
Lpcat2b	34640.4	1.06495e-09	2.35917e-08	-1.52715
Cgrrf1	8013.91	6.33906e-11	1.68034e-09	-1.52672
Socs7	45433.1	5.33653e-06	6.15269e-05	-1.52634
Umodl1	1032.27	2.39386e-05	0.000232592	-1.52547
Spata24	57045.7	2.43252e-07	3.66937e-06	-1.52526
Sik2	4367.3	5.80758e-08	9.75711e-07	-1.52426
B3gntl1	777.441	0.000905447	0.00560286	-1.52291
Isca1	21538.9	9.16287e-17	5.12955e-15	-1.52276
Tmem210	5933.06	0.00129218	0.00757577	-1.52231
Gm16630	535.591	0.00565726	0.0261716	-1.52146
Zp3r	26749	0.00012254	0.000992286	-1.52067
Sqor	42408.8	1.40749e-07	2.20464e-06	-1.51882
Cfap126	15740.7	4.84573e-06	5.61605e-05	-1.51853
Selenov	22556.3	3.64583e-07	5.30356e-06	-1.51801
Bicd1	450.228	0.0287043	0.0941052	-1.5173
Ppid	3761.52	1.70924e-05	0.000171999	-1.51728
Tmed6	2622.08	0.0171665	0.0631855	-1.51727
Crem	26336.3	6.20172e-06	6.95876e-05	-1.51536
Commd3	4316.2	0.000189232	0.00143914	-1.51514
Mdga2	974.028	0.00145329	0.00838713	-1.51511
Camkv	655.394	0.00153735	0.00879634	-1.51488
Ube2w	5994.08	0.00027544	0.0020119	-1.51444
1700120E14Rik	1818.48	0.000697794	0.00446398	-1.51414
Ccdc92	70751.4	2.42804e-09	5.08805e-08	-1.51248
Gm14424	644.658	0.00134961	0.00785598	-1.51244
Sun3	7710.23	0.00053945	0.00356795	-1.51217
Tent4b	24149.5	1.38821e-06	1.82123e-05	-1.51194
4930522H14Rik	6021.15	0.000203034	0.00153583	-1.51178
Klkb1	1081.49	0.000419678	0.00287454	-1.51172
Grin2b	5583.95	0.0001032	0.000848079	-1.51151
Ccdc150	14079.7	6.28912e-07	8.77816e-06	-1.51145
4930570G19Rik	1646.26	4.75773e-05	0.000428693	-1.511
Scgb2b23-ps	1404.07	0.00229081	0.0123089	-1.51096
Cacul1	26438.2	2.81918e-15	1.3011e-13	-1.51066
Tcea1	3461.46	0.0110457	0.0446754	-1.51038
Pdgfa	1523.1	1.24417e-05	0.000129139	-1.51021
Aldh8a1	270.718	0.0206381	0.0731297	-1.51008
Mphosph9	8730.04	1.96763e-14	8.22428e-13	-1.50997
Ncbp2	7142.66	2.69977e-08	4.82875e-07	-1.50989
Arnt2	373.569	0.0342909	0.107869	-1.50925
Tor1aip1	25833.9	6.36474e-05	0.000555128	-1.50888
Catsperg1	18484.7	7.25613e-10	1.64986e-08	-1.50791
Ak1	28798.6	8.39841e-07	1.1404e-05	-1.50321
Ppm1n	659.844	0.0429263	0.127987	-1.50113
Jazf1	6008.67	9.54733e-05	0.000794262	-1.50097
4930522O17Rik	2372.77	0.00787617	0.0340217	-1.50096
Pudp	8724.26	1.68854e-05	0.000170138	-1.50077
Micos10	10132.6	0.000385769	0.00268136	-1.50052
Glrp1	203.178	0.0413987	0.124848	-1.50048
4930444G20Rik	1586.52	0.000127439	0.00102735	-1.5001
Catsper1	15390.3	2.05347e-10	5.09491e-09	-1.5
Slc9c1	33029.7	5.64028e-07	7.94404e-06	-1.49954
Arel1	22468.1	5.54038e-06	6.34056e-05	-1.4992
Cdipt	2992.66	2.36125e-06	2.92927e-05	-1.49911
1700007P06Rik	2234.04	7.79845e-05	0.000667387	-1.4989
Ccdc84	302.894	0.0433599	0.128932	-1.49829
Tax1bp1	58724.6	7.32066e-08	1.21543e-06	-1.49827
Gm15441	1087.09	0.00449856	0.0217318	-1.49825
A930024E05Rik	845.658	0.0142274	0.0546788	-1.49819
Gm4251	338.822	0.0283047	0.0931565	-1.49809
4930467E23Rik	1335.1	0.0295515	0.09636	-1.49804
4931403G20Rik	3113.04	5.50804e-06	6.31288e-05	-1.49773
Itga10	192.773	0.0430041	0.128146	-1.49772
Rnf148	6849.35	0.00257612	0.0135739	-1.49756
Spata31	28649.2	2.94473e-07	4.3614e-06	-1.4962
1700072I22Rik	657.01	0.0018892	0.0104447	-1.4956
Pitx2	457.402	0.0128842	0.05053	-1.49421
Nyx	343.292	0.0134486	0.0521577	-1.4939
Chek1	1196.05	0.000314359	0.00224955	-1.49356
Cfap299	9333.66	3.59878e-10	8.63874e-09	-1.49352
4933406J09Rik	272.022	0.0312331	0.100714	-1.49272
Oga	18606.5	6.0506e-13	2.13242e-11	-1.49258
Uri1	17363.7	2.61415e-06	3.19446e-05	-1.49257
4933422A05Rik	881.525	0.00773021	0.0335307	-1.49206
Hyal5	15794.8	1.12505e-06	1.49881e-05	-1.49185
Sord	356699	6.0759e-06	6.83882e-05	-1.4916
Ppp2cb	15148.8	1.07201e-08	2.05231e-07	-1.4908
Prss23	1514.56	0.00144298	0.00833991	-1.49019
Ccpg1	19732.1	8.1557e-07	1.11395e-05	-1.49014
Picalm	21403.1	2.26154e-06	2.82364e-05	-1.49014
Inpp4a	6424.44	6.05667e-06	6.82564e-05	-1.49005
Myl4	2975.09	0.000171466	0.00131891	-1.48928
Cdca2	23246.8	1.27664e-06	1.68771e-05	-1.48859
1700012B09Rik	13413.9	0.000260078	0.00191593	-1.48834
Lipf	450.058	0.0255295	0.0861557	-1.48822
BC039966	255.893	0.0391864	0.119525	-1.48802
Ftmt	11588.4	1.84416e-09	3.95537e-08	-1.48742
Adgrl2	4693.89	1.69202e-05	0.000170378	-1.48738
Fam229a	19003.9	0.00422748	0.0205761	-1.48709
Hpf1	3849.21	2.20628e-06	2.77926e-05	-1.48635
B330016D10Rik	1489.55	0.00963112	0.0400832	-1.48623
1810013L24Rik	22797	8.66242e-08	1.41101e-06	-1.48609
Adcy10	48943.4	9.963e-06	0.000106256	-1.48602
Osbpl9	15456.9	3.46225e-08	6.03246e-07	-1.48547
Pfn4	34686.5	5.68168e-10	1.31698e-08	-1.48482
Gm41410	327.011	0.0267849	0.089316	-1.48468
Gm6225	874.084	0.000574426	0.00377122	-1.48465
Dio2	623.483	0.00902987	0.0381016	-1.48339
Spaar	225.185	0.0496635	0.142361	-1.48319
Ctag2	6568.46	0.000102362	0.00084253	-1.48314
Ghitm	39573.7	4.92863e-09	9.86171e-08	-1.4831
Ccdc7b	15498.5	0.000129062	0.00103805	-1.48306
Catsper3	10051.7	2.23855e-07	3.40325e-06	-1.48276
Gm2518	1160.4	0.000482839	0.00323989	-1.48256
D1Ertd622e	2641.55	1.98999e-05	0.000197542	-1.48066
Zdbf2	11210.9	1.20697e-07	1.90402e-06	-1.4805
Cldn34b3	971.726	0.00906483	0.0381979	-1.48029
1700019N19Rik	30357.6	0.00133831	0.00780782	-1.47992
1700006A11Rik	11154.5	1.25784e-05	0.000130297	-1.47978
Gsdma	1044.74	0.0260256	0.0873925	-1.47966
Plcxd2	494.597	0.0267658	0.0892787	-1.47934
Pfkfb3	4802.13	3.13658e-06	3.74722e-05	-1.47898
Nadk2	5510.55	6.7065e-10	1.53615e-08	-1.47835
4933402J10Rik	7759.71	0.00497125	0.023541	-1.47746
Fkbp7	1107.54	0.00031048	0.00222589	-1.47727
Camk2n1	14500.2	1.48009e-06	1.9271e-05	-1.4772
Sel1l2	10683.9	2.88899e-08	5.14346e-07	-1.47659
Tns1	59562.9	5.66597e-07	7.97298e-06	-1.47659
Ttbk1	51351.3	0.0121613	0.0482192	-1.47628
Grk3	11654.2	0.000153095	0.00119599	-1.47574
Luzp1	48340.4	6.49341e-05	0.000564108	-1.47506
Fam122c	3317.8	0.010013	0.0414609	-1.47444
Dmtn	482.56	0.0235755	0.0809722	-1.47389
3110056K07Rik	596.471	0.00245087	0.0130156	-1.47365
Taf13	2283.63	1.76727e-05	0.000177379	-1.47263
1700034H15Rik	701.735	0.0161131	0.0603687	-1.47225
2810001G20Rik	2090.98	2.41949e-05	0.000234787	-1.47222
Nlrc4	489.277	0.00622687	0.0282257	-1.47205
Tmem243	3109.47	0.000822446	0.00517181	-1.4719
Gm5800	2905.14	0.00310067	0.0158217	-1.47048
4932429P05Rik	3151.69	1.93953e-05	0.000193293	-1.46939
1700003H04Rik	13844.7	0.00161022	0.00912969	-1.46913
1700105P06Rik	951.995	0.0193333	0.0694791	-1.46876
Mcu	1856.89	0.0011125	0.00665569	-1.46762
Pdzk1ip1	5365.91	6.89141e-06	7.63868e-05	-1.46762
Sugt1	13287.4	2.97796e-09	6.16545e-08	-1.46739
Pafah1b1	41496.4	3.8422e-08	6.65709e-07	-1.46699
Gm7827	893.457	0.0150775	0.0572917	-1.46676
Arl2bp	45140.6	2.92101e-08	5.18262e-07	-1.46655
Pcdh17	902.102	0.0114442	0.0459991	-1.46647
1700003I22Rik	3047.28	0.00713302	0.0314954	-1.46642
Gnpda2	7675.52	2.37101e-06	2.93903e-05	-1.46601
Tbc1d21	14404.4	0.000958582	0.00584995	-1.46598
Morn2	25924.6	0.0023288	0.0124698	-1.46587
Ankrd7	21733.3	3.19895e-06	3.81585e-05	-1.46582
Aven	24631.4	7.15974e-11	1.8818e-09	-1.46579
Mex3b	5125.12	1.32235e-06	1.74219e-05	-1.46569
Dram1	2250.93	0.000285235	0.00207076	-1.46509
Fam221b	25829.3	4.92098e-05	0.000441351	-1.46423
Ormdl2	4328.67	9.35766e-07	1.26072e-05	-1.46409
Fam24b	9817.61	2.45725e-05	0.000238004	-1.46385
4930430F08Rik	2833.52	0.00110596	0.0066268	-1.4637
Parp6	3439.78	4.49237e-05	0.0004062	-1.46351
Cklf	10582.5	5.85525e-05	0.000514142	-1.46297
Cfl2	10893.3	5.83179e-05	0.000512372	-1.46294
4932413F04Rik	731.237	0.00733202	0.032169	-1.46293
Mthfd2l	954.844	0.0051016	0.0240824	-1.46282
Unc45b	869.526	0.016559	0.0615703	-1.46274
Samd8	15189.1	1.41159e-10	3.58845e-09	-1.46251
Pla2g2c	12486.7	1.36893e-07	2.14859e-06	-1.46246
Dnajc9	6238.7	5.97454e-06	6.73798e-05	-1.46072
Gria4	750.748	0.00634089	0.0286087	-1.46062
Ptrh2	1775.69	5.2942e-05	0.000471551	-1.46029
Zfp91	47652.9	1.29025e-08	2.44296e-07	-1.45956
Tex21	30910.5	1.19373e-10	3.04461e-09	-1.45931
Rnf43	457.086	0.0178595	0.0651028	-1.45849
Ubl5	9411.55	8.69426e-08	1.41471e-06	-1.4581
Zcchc7	4565.68	5.41276e-07	7.65836e-06	-1.45734
Fam76a	32793.7	7.03615e-09	1.38464e-07	-1.4571
Spatc1l	20297.7	3.00123e-06	3.60776e-05	-1.45594
Cftr	2536.6	0.000567355	0.00373587	-1.45593
Rapgef5	3031.68	1.41591e-05	0.000145215	-1.45542
Rhod	441.896	0.0265957	0.088846	-1.45477
Ccdc183	12200.3	2.60334e-05	0.000250901	-1.45427
Zfp654	79292.8	8.93746e-07	1.20831e-05	-1.45405
Calr3	9442.13	0.00278273	0.0144756	-1.45377
Fabp9	111299	0.000169548	0.00130546	-1.4537
Ppt1	19025	0.000319816	0.00228017	-1.45298
Cspg5	323.74	0.0205659	0.0729562	-1.45281
Thegl	14473.4	4.06966e-06	4.77731e-05	-1.45208
4933406K04Rik	2634.56	0.00781316	0.0338005	-1.45101
Lmbrd2	3044.61	4.88422e-05	0.000438562	-1.45043
Apobec4	9596.53	4.49054e-05	0.0004062	-1.4503
Fez1	774.346	0.0172292	0.0633411	-1.44999
Lats2	23956.5	1.05982e-06	1.41923e-05	-1.44923
Eapp	6193.7	3.21928e-07	4.72293e-06	-1.44874
Zmiz2	37317.5	0.000462301	0.00313015	-1.44873
1700067P10Rik	10961	2.65008e-09	5.5013e-08	-1.44859
Fem1c	64092.2	6.37439e-09	1.25921e-07	-1.44852
Gm4922	1525.55	7.15119e-05	0.000615733	-1.44849
Parvg	2742.39	9.58177e-05	0.000796273	-1.44841
Cdc25c	2352.62	3.13715e-05	0.000295551	-1.44805
Adora3	409.243	0.0482907	0.139605	-1.448
Usp49	7393.63	4.2427e-05	0.000385422	-1.44757
Lipo2	347.243	0.025538	0.0861657	-1.44751
Ctbp2	5268.5	4.18624e-08	7.18893e-07	-1.44676
4930480E11Rik	919.947	0.00628765	0.0284016	-1.44648
Afg3l1	5032.49	5.40119e-05	0.000479855	-1.44635
1700025F22Rik	6203.65	0.000399061	0.00276384	-1.44628
Dcun1d3	8898.98	2.28313e-05	0.000223372	-1.44551
Itgbl1	589.23	0.0189441	0.0683338	-1.44539
Kri1	2595.33	1.29597e-05	0.00013371	-1.44517
Dzip1	39561.6	4.13676e-08	7.11972e-07	-1.44516
Nlrp14	25525.6	7.88613e-08	1.29958e-06	-1.4451
Tctex1d1	11284.9	0.0206478	0.0731352	-1.44427
1700029I15Rik	2535.99	0.00229065	0.0123089	-1.44426
Lmbr1l	24923.6	3.24346e-05	0.000304089	-1.44366
Gpr4	752.667	0.00807379	0.0347103	-1.44341
Ubc	108410	2.04014e-07	3.12923e-06	-1.4428
Ppp1r11	81365.5	0.00192269	0.0105991	-1.44165
Tfpt	2218.03	1.83706e-05	0.000183552	-1.44144
Gm4984	5398.69	0.0163082	0.0608788	-1.44115
Gm6117	731.836	0.0127497	0.050091	-1.44081
Prame	1553.18	0.000947234	0.00579852	-1.44044
Fhl4	541071	6.88027e-05	0.00059497	-1.44043
Il3ra	1878.89	0.00051607	0.00344054	-1.4401
Pdp1	6378.79	3.75688e-07	5.44467e-06	-1.43968
H2al1g	2469.93	0.0242281	0.0827544	-1.43922
Tmem8	18622.4	6.58649e-06	7.3374e-05	-1.43841
Nup160	6133.68	9.84166e-08	1.57986e-06	-1.43824
Abcg2	3582.56	0.00349518	0.0174894	-1.43504
Dgkh	20509.1	1.02395e-05	0.000108831	-1.43492
Arpc1a	16611.5	3.8854e-09	7.91734e-08	-1.43445
Csf2ra	397.188	0.0475899	0.138198	-1.43412
8430429K09Rik	1273.8	0.000156406	0.0012194	-1.43408
Xntrpc	592.461	0.020286	0.0722454	-1.43407
1110006O24Rik	3250.76	0.000405104	0.00279861	-1.43396
Nfkbiz	858.279	0.0142781	0.0548318	-1.43395
Rap1gap2	609.798	0.0305443	0.0990279	-1.43367
Otud7b	21271.7	0.000362854	0.0025449	-1.43367
Cspp1	6437.42	8.56474e-06	9.27468e-05	-1.43256
Capzb	36174.5	9.14146e-08	1.47971e-06	-1.43243
Fhad1	36107.4	5.07846e-05	0.000453639	-1.43179
1700065I16Rik	3406.66	0.000410337	0.0028277	-1.43146
4932415M13Rik	2304.3	0.000262452	0.00193158	-1.4312
Susd1	309.172	0.0435102	0.12923	-1.43099
Gemin6	2468.27	3.86394e-05	0.000354694	-1.43079
Zfp759	2649.73	0.0009157	0.00564993	-1.4297
2810029C07Rik	3622.82	7.60214e-06	8.32531e-05	-1.42875
Asnsd1	56062.3	2.51641e-08	4.52166e-07	-1.42839
Lrif1	13031.9	7.03022e-05	0.000606665	-1.42838
Glb1l3	4476.69	0.000384705	0.00267539	-1.42832
Tm9sf2	27395.7	8.01843e-13	2.76315e-11	-1.4281
C1d	990.188	0.0147801	0.0563965	-1.42758
Npm2	368.68	0.0235745	0.0809722	-1.42756
Hspa4l	124726	2.27142e-05	0.000222507	-1.42704
Tpt1	18850.7	0.000767802	0.0048617	-1.427
Coq4	9645.89	1.56798e-05	0.00015903	-1.4264
4922502D21Rik	144070	1.9766e-05	0.000196356	-1.42614
Cecr2	9082.31	1.63861e-05	0.000165753	-1.42529
Pcnt	9903.22	7.59042e-07	1.04533e-05	-1.42516
Cadm1	14572.6	2.89439e-07	4.29094e-06	-1.4249
Ssx2ip	47293.6	3.71477e-07	5.38867e-06	-1.4249
Fancd2os	5395	2.25817e-07	3.42637e-06	-1.42478
Msr1	909.579	0.0150539	0.0572439	-1.42422
Zfp595	437.983	0.0386891	0.118381	-1.42296
Pank2	10491.6	1.75857e-08	3.24259e-07	-1.42291
Cox11	3335.98	1.25118e-05	0.00012978	-1.42263
Mterf2	1248.51	0.00929094	0.0389391	-1.42244
Hpse	590.084	0.0194596	0.0698682	-1.42194
Hspb7	6472.73	0.000321049	0.00228582	-1.42189
4930578E11Rik	621.938	0.016072	0.0602437	-1.42118
4930590J08Rik	14488.1	5.40435e-07	7.65345e-06	-1.42108
BC048562	2664.94	0.000564558	0.00372061	-1.42039
Spaca1	25546.5	0.000122344	0.000991218	-1.42019
Kif5c	2943.57	0.00603027	0.0275682	-1.41971
9030025P20Rik	279.804	0.049995	0.143171	-1.41917
1700066M21Rik	6922.46	2.98462e-07	4.40786e-06	-1.41885
Ddit3	6043.74	5.32898e-06	6.14855e-05	-1.41878
Cldn34b1	1452.81	0.0245344	0.0836531	-1.41778
Spaca6	1385.89	0.00359682	0.0179171	-1.41731
Serpini1	686.432	0.0113792	0.0457886	-1.41719
Smad6	2662.56	0.000298439	0.00215251	-1.41697
Tmco5	23281.7	0.000242821	0.0018077	-1.41682
Zdhhc11	4638.49	1.04448e-05	0.000110709	-1.41638
Selenoi	4127.77	4.29381e-06	5.01386e-05	-1.41622
Bag5	115333	4.03259e-08	6.96363e-07	-1.41586
Polr3f	1339.82	0.00386294	0.019053	-1.41553
Ccdc27	11959.4	5.97122e-07	8.37212e-06	-1.41503
Ace3	13409.6	2.71275e-08	4.84638e-07	-1.41499
Acp4	1394.21	0.00129724	0.00759678	-1.41464
Bri3	6196.16	0.0001617	0.00125374	-1.41363
4933409G03Rik	5264.77	0.00564237	0.0261105	-1.4135
Ccdc93	3825.26	1.23543e-06	1.63603e-05	-1.41345
Ccdc169	8735.24	0.000479349	0.00321925	-1.41332
Spire1	2809.78	0.00025836	0.00190508	-1.41313
Zfp330	5209.63	3.22182e-05	0.000302243	-1.41255
Hhatl	797.801	0.00810316	0.0348077	-1.41219
Plaat5	117032	0.000161518	0.00125296	-1.4115
4930453L07Rik	601.807	0.0419236	0.12597	-1.41127
1700113H08Rik	10131.2	7.48996e-05	0.000643472	-1.41123
Arhgap44	2701.37	8.60718e-06	9.31413e-05	-1.41105
Alkbh1	1211.1	0.00056977	0.00374859	-1.41054
Sccpdh	73880	3.24094e-09	6.65658e-08	-1.41054
Clhc1	4518.89	3.17928e-05	0.000298976	-1.40984
Gm41279	411.168	0.0399061	0.121088	-1.40964
Ap4s1	1552.26	0.000277807	0.00202632	-1.40942
Gpr160	25078.5	3.62949e-06	4.2931e-05	-1.4094
G6pc3	24845.1	1.59241e-07	2.47927e-06	-1.40908
Rpgrip1	38996.6	1.11505e-05	0.000117096	-1.40897
Dok7	2859.98	3.12035e-05	0.000294685	-1.40889
Npepl1	2515.91	3.56149e-05	0.000329719	-1.40872
3110070M22Rik	12947.9	0.00121026	0.007155	-1.40848
Hbs1l	21778.4	3.12572e-08	5.51428e-07	-1.4078
Cd5l	540.585	0.0423884	0.126822	-1.40753
4933411G06Rik	4237.07	3.77827e-05	0.000347506	-1.40741
Desi1	42520.6	1.50891e-06	1.95478e-05	-1.40694
Gm33301	719.217	0.00734897	0.0322013	-1.40657
Timm9	895.668	0.00187334	0.0103713	-1.40598
4930553C11Rik	1570.93	0.00168447	0.00947446	-1.40544
Zfand6	12676.6	5.77344e-06	6.57333e-05	-1.40506
Pitpnm3	733.045	0.00926134	0.0388465	-1.40482
Igf2bp3	13991.3	1.43055e-05	0.000146523	-1.40434
Gml2	2573.45	0.00263185	0.0138252	-1.4041
4930525C09Rik	584.06	0.0270158	0.0898421	-1.40382
B3gat2	418.968	0.0484916	0.139863	-1.40374
Tex43	8334.61	0.000540032	0.0035696	-1.40373
Gata6	1238.5	0.000479798	0.00322088	-1.40201
Crls1	8983.6	7.00704e-06	7.75022e-05	-1.40165
Rfk	4682.39	9.76845e-06	0.000104613	-1.40122
Map4k3	4882.68	0.000275169	0.00201086	-1.40036
Fkbpl	21790.4	6.42616e-06	7.17943e-05	-1.40024
Agap1	3197.91	4.11864e-06	4.82749e-05	-1.40006
Adam3	156239	1.55448e-07	2.42265e-06	-1.39996
Eif3j2	2090.88	0.00217189	0.0117473	-1.39996
Slc35f2	1170.02	0.0267351	0.0892148	-1.39964
Nme5	10762.3	9.07567e-05	0.000760737	-1.39899
Tmod2	10991.2	0.00104504	0.00631055	-1.39831
Gtpbp2	10465.2	6.37286e-09	1.25921e-07	-1.39818
Xrra1	51980.7	3.03215e-06	3.63928e-05	-1.39791
Kcne3	14073.8	0.000632268	0.00410921	-1.39765
Spag4	24976.1	0.000142681	0.00112484	-1.39719
Zfp37	21911.8	0.000109943	0.000899202	-1.39692
Tmem267	37869.7	0.0113324	0.0456562	-1.39683
Clec4a2	617.521	0.0443978	0.131138	-1.39672
Ppp4r1	42241	1.33601e-05	0.000137658	-1.39663
Gsto2	31010.1	2.88806e-06	3.48523e-05	-1.39637
Fam122a	2033.76	0.000201595	0.00152643	-1.39592
Clk1	2236.71	0.000177044	0.0013551	-1.39588
Slc38a9	6475.29	3.55859e-09	7.2705e-08	-1.39587
1700123O20Rik	2455.74	9.84324e-06	0.000105341	-1.39586
Flvcr2	6138.38	4.37599e-07	6.31241e-06	-1.39515
Tusc3	20602.6	7.98894e-09	1.5583e-07	-1.39514
Myom2	363.647	0.0335803	0.106185	-1.39506
Wdr13	5144.25	0.000515292	0.00343683	-1.39453
Kbtbd3	594.949	0.0133925	0.0520103	-1.3943
Zbtb11os1	2175.21	0.000538731	0.00356679	-1.39425
Rd3	13682.5	1.17738e-06	1.56181e-05	-1.39242
Cenpl	3046.39	4.22056e-05	0.000384086	-1.39242
Tmem191c	7537.64	0.000500345	0.00334433	-1.39212
Fam149b	6809.67	1.41512e-06	1.84871e-05	-1.39098
Trmt10c	1047.21	0.00222913	0.0120233	-1.39095
Wdr12	22831.3	2.69965e-08	4.82875e-07	-1.39088
Ppargc1b	533.226	0.0433929	0.129006	-1.39082
Hipk2	1683.25	0.00830393	0.0354638	-1.39055
Gm7444	77867.4	0.0193027	0.0694016	-1.39046
Eno1	29839.7	0.00203671	0.0111641	-1.39021
Gm732	1771.46	0.0158477	0.059576	-1.38993
Armc12	28430.6	0.0252306	0.0854269	-1.38956
Gm35060	1045.07	0.0153444	0.0581772	-1.3895
Aste1	11812.5	1.7008e-07	2.6348e-06	-1.38827
Tex30	11888.3	0.00513705	0.0242204	-1.38775
Mrpl1	9874.08	0.00015294	0.00119599	-1.38725
Gfra1	1497.26	0.00168811	0.00948805	-1.38705
Naa38	7153.04	0.00117425	0.00696599	-1.387
4930562F07Rik	1231.96	0.00674046	0.0300378	-1.38691
1700129C05Rik	27384.1	1.39773e-06	1.83217e-05	-1.38658
Gm1527	1759.66	0.000160026	0.001242	-1.3857
Tbc1d7	1918.05	0.000850233	0.00532279	-1.38566
Ugp2	5142.08	0.000731803	0.0046604	-1.38557
Prdx6b	74683	2.80716e-07	4.18161e-06	-1.38555
Fhl5	16788.6	0.0437944	0.129752	-1.38549
Rgs22	41135	2.75012e-06	3.34217e-05	-1.38448
Pla2g10	2121.36	0.00691351	0.0306922	-1.38419
Slc25a54	2831.75	0.00114882	0.00684132	-1.38389
1700029M20Rik	42471.5	2.80962e-10	6.86124e-09	-1.3837
Epn1	15004	0.000417641	0.00286311	-1.38347
Nudt18	43909	8.18177e-06	8.90974e-05	-1.38345
Dis3	14154.8	1.11582e-11	3.26471e-10	-1.38342
1700094D03Rik	3802.66	6.1098e-05	0.00053528	-1.3825
Itga2	549.856	0.0261555	0.087694	-1.3825
1700011B04Rik	630.626	0.00928069	0.0389107	-1.38213
Kbtbd11	5085.42	0.000423088	0.00289661	-1.38202
Mtmr4	11583.7	0.0022918	0.01231	-1.38177
4921525O09Rik	6304.74	0.00028984	0.00209881	-1.38173
4921504A21Rik	2529.65	0.00013661	0.00108916	-1.38149
Zfp788	2480.72	3.53757e-05	0.000328205	-1.38103
Bbs5	6722.14	0.00116537	0.00692626	-1.38054
Tmem82	463.797	0.0431515	0.128485	-1.38045
Irx5	808.328	0.0179505	0.0653732	-1.37944
Col4a3bp	13512.8	3.6202e-05	0.000334555	-1.3794
1700074P13Rik	39528.8	0.0258071	0.0868092	-1.37918
Ubxn6	101776	0.000579734	0.00380285	-1.37862
Csrp2	1775.93	0.00150348	0.00863819	-1.37833
Pfdn5	29423.3	0.0102819	0.0423371	-1.37824
Dcp1a	3281.55	0.000304991	0.00219364	-1.37714
Gm20831	1314.8	0.00605496	0.0276566	-1.37691
Ocel1	6468.19	0.000727625	0.0046357	-1.37688
Apopt1	3422.81	0.00154315	0.0088202	-1.37685
Zfp944	2923.35	0.00016686	0.00128795	-1.37683
1700016G22Rik	829.751	0.0384062	0.117631	-1.37682
Axdnd1	30360.5	9.74443e-05	0.00080849	-1.37674
Psmc6	4297.53	0.0111244	0.0449657	-1.37664
Fndc8	9473.31	0.0139712	0.0539068	-1.37661
4930451G09Rik	7157.48	9.52289e-08	1.53505e-06	-1.37646
Prkg1	2944.55	0.00583247	0.02683	-1.37632
Ppm1b	30272.7	1.7644e-05	0.000177206	-1.37591
Pih1d3	1743.54	0.0381336	0.117027	-1.37548
Rassf1	8099.91	4.5023e-07	6.47055e-06	-1.37502
Hyal6	19520.9	0.00433041	0.0210177	-1.37446
Agpat3	60389.9	0.000110851	0.000904716	-1.37442
Cep128	45166.3	0.00226388	0.0121853	-1.37427
Rita1	814.6	0.0313302	0.100943	-1.37403
Gm16677	3188.98	0.00468155	0.022448	-1.37389
Fam13c	1223.99	0.00829239	0.035434	-1.37365
1810044D09Rik	6637.47	0.00769004	0.0334219	-1.37331
Ccl25	493.366	0.0284276	0.0934353	-1.37189
Ica1	8749.8	0.000966481	0.00588195	-1.37176
Zfand4	44856.5	3.94871e-08	6.82638e-07	-1.37165
Oxgr1	804.634	0.0160376	0.0601586	-1.37125
Fuca2	2340.46	0.0310708	0.100336	-1.37099
4930429H19Rik	737.325	0.00652234	0.0292534	-1.37017
Fbxl13	16108.8	1.11687e-05	0.00011718	-1.36977
Gm5092	524.899	0.0186434	0.0674687	-1.3696
Ell2	11762	0.000146596	0.00115167	-1.36939
Fam228b	1734.74	0.00282969	0.0146815	-1.36923
1700001P01Rik	7172.12	0.00167065	0.00940012	-1.36923
Naa80	11526.2	0.00643563	0.0289268	-1.36887
Ifrd2	932.819	0.0203932	0.0724982	-1.36873
Actn4	4982.43	0.000872995	0.00544332	-1.36869
Arhgap12	3366.65	0.00249533	0.0131939	-1.36842
Aldoa	53911.7	3.46754e-05	0.000323144	-1.36829
Dnajb13	28635.3	0.00421298	0.0205313	-1.36797
Clasp1	11979.8	0.00337665	0.016984	-1.36778
1700022H01Rik	3617.69	0.00710545	0.0314005	-1.367
Akap3	144807	3.42658e-07	5.01282e-06	-1.36691
Cacna2d2	652.573	0.036697	0.113614	-1.3668
4930483J18Rik	3772.47	9.29713e-05	0.000776363	-1.3668
Kazald1	324.148	0.0486745	0.140218	-1.36652
Ccdc188	5500.79	0.0128272	0.0503318	-1.3663
Prkcz	1930.94	0.00170951	0.00959206	-1.36627
Mcts2	3403.8	0.00303893	0.0155681	-1.36584
Poc1b	15167.6	5.51741e-06	6.31895e-05	-1.36564
Trnt1	8809.36	8.16672e-07	1.11395e-05	-1.36553
Srcin1	12015.5	0.00552601	0.025687	-1.36552
Art5	11635.9	1.85268e-06	2.37434e-05	-1.36551
Gm10638	17648.7	0.00282988	0.0146815	-1.36549
Hdac9	573.444	0.0306783	0.0993586	-1.3653
Mkrn2	14099.2	0.000157049	0.00122318	-1.36459
Gm11837	47435.7	0.00282827	0.0146815	-1.36458
Glmn	3415.97	0.000405164	0.00279861	-1.36414
Ppp6c	7109.1	3.59589e-05	0.000332706	-1.36386
Cadm2	888.741	0.0391767	0.119519	-1.36349
Riok3	31391.5	0.0076839	0.0334219	-1.36346
Gde1	19567.1	0.000204423	0.00154549	-1.36333
Gm5458	673.13	0.0267423	0.0892196	-1.36318
Cenph	878.05	0.00867138	0.0368201	-1.36286
Letm2	24788.9	3.45342e-07	5.04733e-06	-1.36262
Cacna1c	546.096	0.0406296	0.122983	-1.36237
Fank1	40878	7.88444e-06	8.60408e-05	-1.3623
Cox16	4087.93	0.000885904	0.00550831	-1.36193
4930579F01Rik	10013.7	8.17485e-07	1.11395e-05	-1.3616
Tmem68	542.119	0.0488461	0.140608	-1.36128
Actl7a	50665.4	2.32888e-05	0.000227275	-1.36121
Lrrc43	20048.8	3.13628e-05	0.000295551	-1.36104
Galnt3	46003.4	2.96199e-08	5.24334e-07	-1.36099
Spata33	36312.3	6.71736e-05	0.000582259	-1.36046
Spc25	3647.69	0.000132952	0.00106547	-1.36045
Rnf125	12628.4	0.000102629	0.000844009	-1.36044
Thoc7	8391.57	0.00124594	0.0073296	-1.36044
Gm21269	1222.98	0.0368431	0.113969	-1.36023
Triml1	7540.08	8.87334e-05	0.000747414	-1.36002
Ccdc173	15442	0.000410719	0.00282816	-1.35967
Oplah	13459.9	0.000167902	0.00129406	-1.35939
Elmo1	2903.39	0.0189534	0.0683512	-1.35859
Emid1	856.57	0.0172017	0.06327	-1.3584
Fbxo30	48813.8	2.63238e-06	3.2142e-05	-1.35818
Cd24a	781.438	0.0106644	0.0434335	-1.35801
Gm15908	3738.17	0.000394248	0.00273539	-1.35789
Gfra4	2859.06	0.00109778	0.00658539	-1.35775
Cage1	73723.1	3.48316e-05	0.000324015	-1.3576
Zfp712	631.261	0.0230597	0.0796761	-1.35755
Eqtn	13254	0.00790438	0.0341145	-1.35733
Egln2	105353	0.000242523	0.00180634	-1.35721
Afap1l1	870.584	0.0211735	0.0745713	-1.35712
Manf	25872.1	0.000159751	0.00124049	-1.3565
2700054A10Rik	1837.59	0.00161429	0.00914045	-1.35649
Msi2	7275.84	2.12858e-06	2.69013e-05	-1.35643
A330035P11Rik	649.885	0.0209712	0.0740944	-1.35622
Hist1h2bp	8207.2	0.0103528	0.0425725	-1.35594
Exosc9	3329.4	0.000173038	0.00132853	-1.35567
1700029F12Rik	83984	1.29683e-06	1.71295e-05	-1.35495
4933421I07Rik	1297	0.00206334	0.0112782	-1.35473
Micalcl	18146.6	0.00141131	0.00816918	-1.35445
Ctdsp2	8398.69	1.11765e-05	0.000117183	-1.35438
Zfp607a	1047.86	0.00226751	0.0122006	-1.35373
Catsper2	54563.2	8.56257e-07	1.16168e-05	-1.35372
Shisa3	9237.88	0.00179745	0.0100047	-1.35358
Grhl1	2126.29	0.000196715	0.00149386	-1.35344
Gnpat	55290.2	8.16678e-08	1.34013e-06	-1.35341
Rabepk	29369.3	0.00014266	0.00112484	-1.3534
Actr10	46606.5	0.000236176	0.00176245	-1.35226
Kcnu1	11480	7.59939e-06	8.32531e-05	-1.35221
Zfp558	2763.97	0.00484053	0.0230535	-1.35216
Ccdc42os	808.568	0.0153687	0.0582516	-1.35211
Guk1	6378.25	0.00330911	0.0167421	-1.35204
1700071K01Rik	1182.45	0.0197777	0.0707805	-1.35176
Fam47c	4290.5	0.00178091	0.00992611	-1.35047
Tbata	17410.8	0.00291571	0.0150462	-1.35045
Thoc1	10710.8	1.17008e-05	0.000122102	-1.3503
4921504E06Rik	5836.6	0.0010049	0.00608948	-1.34967
Fhdc1	6881.55	0.00157327	0.00895949	-1.34961
Phc1	35889.2	0.000453376	0.00307411	-1.34944
4930467D21Rik	521.965	0.0287909	0.0943692	-1.34844
Eid3	76148.9	0.000142389	0.00112425	-1.34798
Psmg2	4923.1	5.62835e-05	0.000497315	-1.34774
Sec14l1	50561.5	8.35668e-05	0.000709288	-1.34757
Haglr	2803.95	0.0165361	0.0615667	-1.34752
4930463O16Rik	664.299	0.0347198	0.108849	-1.34739
Tpi1	68956.9	9.09062e-05	0.000761578	-1.34724
Zfp933	908.478	0.012219	0.048411	-1.34714
Lnpk	6501.95	0.00198759	0.0109142	-1.3468
C330018D20Rik	922.242	0.0185964	0.0673299	-1.34659
Pacsin1	1786.55	0.0130229	0.050981	-1.34651
Fam229b	105139	0.00774062	0.0335665	-1.34633
Nrxn3	680.153	0.0293446	0.0958397	-1.34579
Sh3yl1	1788.95	0.0062695	0.0283443	-1.34578
Rasal1	1316.25	0.0123303	0.0486777	-1.34539
Slco6c1	38600.3	9.98715e-06	0.00010644	-1.34502
Tssk4	18254	9.23763e-05	0.000772226	-1.34501
Trim59	7909.93	2.74185e-05	0.000263594	-1.34471
Sertad2	31665.1	0.00626354	0.0283348	-1.3447
Ccnd3	16908.7	4.37217e-06	5.09768e-05	-1.34402
Hjv	1827.33	0.00228011	0.0122642	-1.34376
Ipo5	174651	4.23637e-05	0.000385073	-1.34348
Nelfe	23252	9.11919e-06	9.80661e-05	-1.34334
Enkur	21888.8	0.00402023	0.0197159	-1.34273
Crlf2	3084.67	0.00362705	0.0180445	-1.34218
Mirg	1093.83	0.0135988	0.0526926	-1.34194
Adam24	24143.7	0.00156464	0.00891836	-1.34172
Pfkfb4	8449.49	1.50544e-06	1.95191e-05	-1.34162
Rnf14	12898.7	6.28768e-07	8.77816e-06	-1.34124
Aldoart1	22575.5	0.0002151	0.00161842	-1.34104
Fam204a	2731.34	0.00274885	0.0143378	-1.34089
Hat1	5653.19	0.000411722	0.0028313	-1.34069
Creb3l4	31831.9	0.0110007	0.0445515	-1.34053
Insl6	16993.4	0.0449858	0.132472	-1.34026
Alg12	2234.67	0.00732329	0.0321524	-1.34008
Mgat5	3032.49	0.00502886	0.0237897	-1.33968
Adat2	1819.08	0.02307	0.07968	-1.33902
Slc9a2	723.405	0.0296814	0.096614	-1.33898
Efcab3	20250.9	7.03589e-05	0.000606817	-1.33887
Osbpl10	20359.3	2.75895e-07	4.11771e-06	-1.33846
4921509C19Rik	1657.97	0.0248673	0.0844539	-1.33755
Rbm46os	1052.37	0.0147037	0.0561897	-1.33748
Clpx	28606.5	2.5737e-05	0.000248354	-1.33707
Alkbh3	4256.93	0.000314623	0.00225039	-1.33655
4930578I06Rik	17721.1	0.0123042	0.0486116	-1.33629
4930555K19Rik	4228.35	0.00186821	0.0103466	-1.33623
Abhd18	1759.7	0.00379807	0.0187988	-1.33619
Lrp2bp	13148.7	0.000227717	0.0017059	-1.33617
Ptchd3	14865.1	0.00134157	0.00782389	-1.33602
Dhrs1	21961.7	2.78077e-06	3.37414e-05	-1.33598
4930592C13Rik	1405.55	0.0107702	0.0437439	-1.33556
Ubp1	10914.6	5.40289e-05	0.000479855	-1.33515
Tlcd1	5424.75	0.000724817	0.00462161	-1.33514
Ncor2	8051.28	0.0129482	0.0507425	-1.33483
Tmem30a	22227.1	3.53878e-05	0.000328205	-1.33449
Oxnad1	3495.85	0.00049624	0.00331975	-1.33432
Cep83	26678.1	2.41324e-06	2.98185e-05	-1.33425
Rps6ka6	3475.14	0.0168472	0.0623062	-1.33416
Zfp992	3197.58	0.0155274	0.0587277	-1.33388
Cox7b2	11364.4	0.011708	0.046841	-1.33373
Ube2v2	3134.46	0.0187535	0.0677564	-1.33352
Smco4	2537	0.0165531	0.0615703	-1.3335
Gm4890	1208.27	0.0316707	0.101723	-1.33323
Sort1	27325.5	5.41195e-08	9.18197e-07	-1.33258
Fgf12	1156.24	0.00568368	0.0262625	-1.33236
Fam110a	11592.6	0.000321295	0.00228652	-1.3322
Cpne5	1324.55	0.0309731	0.100146	-1.33218
Cep295	12896.4	0.00332396	0.0167898	-1.33215
Rhno1	9492.61	5.70829e-05	0.000503231	-1.33204
Fcf1	2390.69	0.00151564	0.00869195	-1.332
Mrpl47	6518.13	0.0017578	0.00981923	-1.33175
Sec61a1	47129.6	1.3431e-09	2.9211e-08	-1.33107
Alg11	3198.2	0.000173028	0.00132853	-1.33057
Mettl9	2078.77	0.0144731	0.055498	-1.33056
Fam53c	21441.2	1.56805e-05	0.00015903	-1.33052
Acox3	9098.02	8.38358e-05	0.000711165	-1.33047
Spata1	32150.9	0.000466098	0.00314662	-1.33037
Stpg3	8089.53	0.0026031	0.0137067	-1.33007
Zpbp	48194.9	0.00107335	0.00645636	-1.32989
Naca	19090	0.000908344	0.00561407	-1.32963
Eif5	93373.5	5.75467e-06	6.56159e-05	-1.32961
Tmtc2	1443.77	0.00378311	0.0187307	-1.32936
Zfp867	1528.45	0.000995618	0.00603559	-1.32904
Rapgef3	771.685	0.0331413	0.105075	-1.32872
1110020A21Rik	4355.65	0.00130675	0.00764457	-1.3286
Tmem81	2734.15	0.00239126	0.0127383	-1.32853
Mas1	4694.44	0.000274635	0.00200883	-1.32836
Lekr1	4906.24	0.000900142	0.00557448	-1.32825
Tmem126a	1034.93	0.0073164	0.0321312	-1.32823
Zfp462	1979.9	0.00636026	0.0286786	-1.32751
Ppwd1	2179.16	0.00304645	0.0155963	-1.3275
1700021F07Rik	16724.6	0.013342	0.0518924	-1.32682
Gm20716	29876.3	2.61188e-05	0.000251568	-1.32668
Dgat1	11849.7	0.000444352	0.00302085	-1.3266
Gm550	4368.57	0.00529899	0.0248778	-1.32651
Ccnc	1784.65	0.00499065	0.0236233	-1.32611
Ctdp1	7506	0.000251029	0.00185543	-1.32518
Cul3	61265.3	0.000571279	0.00375477	-1.32489
Ptprb	700.22	0.019539	0.0700881	-1.32442
Atmin	15121.8	0.00285089	0.0147756	-1.32428
Pacrg	47280.9	3.63909e-05	0.000336101	-1.32422
Ap2b1	112960	7.02851e-05	0.000606665	-1.32411
Cgas	856.112	0.0302462	0.0982256	-1.32401
Usp16	22099.3	0.00010096	0.000834088	-1.3239
Pdpk1	24106.4	0.000167853	0.00129406	-1.32387
Ska1	4314.42	0.00224471	0.0120948	-1.3236
Rwdd1	4238.96	0.00011965	0.000970913	-1.32325
Dynlrb2	5524.63	0.0104003	0.0426775	-1.32302
Corin	3194.22	0.0371336	0.114616	-1.32288
Stimate	852.871	0.0343221	0.107936	-1.32235
Asb4	9695.8	8.75098e-06	9.44996e-05	-1.32198
4930515G01Rik	1475.7	0.00862046	0.0366843	-1.32137
1700019C18Rik	918.975	0.0105427	0.0431132	-1.32119
Spo11	10145	0.0024626	0.01306	-1.32106
Prkcb	656.429	0.0379719	0.1166	-1.32106
Map1lc3a	42800.3	0.00384867	0.0190128	-1.32079
1700018B08Rik	15627.2	0.0144147	0.0552879	-1.32068
Ppm1f	1515.58	0.016154	0.060455	-1.32018
Ptar1	4726.95	5.80661e-05	0.000510448	-1.32017
Pcmt1	40650.6	1.11813e-07	1.77652e-06	-1.31989
Sypl	16199.4	8.38796e-05	0.000711165	-1.31988
Galntl6	9387.48	0.00238906	0.012731	-1.31984
Tcp10b	50017.9	0.000643804	0.00417544	-1.3198
Anapc10	3357.81	0.00015927	0.00123737	-1.31969
Dclre1c	1307.51	0.0142743	0.0548306	-1.31952
Cyp4f39	3963.55	0.00105522	0.00636211	-1.31924
Ankrd49	10045	4.97619e-05	0.000446045	-1.31886
AY702103	22511.2	0.000172684	0.00132762	-1.31865
E130307A14Rik	748.71	0.0444298	0.131183	-1.31844
Aptx	12709.8	2.28368e-06	2.84671e-05	-1.31792
Tssk1	53702.7	0.00158557	0.00901297	-1.31788
[truncated: 3,417 more rows]
