# Supplementary material for: Linking Phospho-Gonadotropin Regulated Testicular RNA Helicase (GRTH/DDX25) to Histone Ubiquitination and Acetylation Essential for Spermatid Development During Spermiogenesis
Source: Front Cell Dev Biol. 2020 May 15;8:310. doi: 10.3389/fcell.2020.00310 (PMC7242631; doi:10.3389/fcell.2020.00310)
Supplement: Supplementary file 5 [file Table_5.xlsx]

## Sheet: BP_5 (down) fc1.5
List of down-regulated DEGs enriched in GO analysis grouped into three functional categories: biological process (BP), cellular component (CC) and molecular function (MF)
Category	Term	Count	P-value	Genes
BP	GO:0007283~spermatogenesis	72	3.21473e-16	SLC22A16, SPATA20, CAPZA3, NR6A1, PRDX4, HOOK1, SPEM1, GALNTL5, DDX25, GPX4, 1110017D15RIK, NEURL1A, CDK16, SPATA24, M1AP, OSBP2, CABS1, TLE3, UBE2J1, ADAM26A, NME8, THEG, TXNDC2, BTG1, TXNDC8, SPATA18, SPATA19, CATSPER1, PEBP1, SLC9C1, KLHL10, RAD23B, H1FNT, CREM, ACSBG2, ROPN1, AKAP14, HSPA1L, OAZ3, TCP11, ACE, CDYL, CNR1, DNMT3L, ODF4, ODF2, ODF1, SPATA6, 3830403N18RIK, SPATA32, FSCN3, PAIP2, …
BP	GO:0048232~male gamete generation	72	3.41076e-16	SLC22A16, SPATA20, CAPZA3, NR6A1, PRDX4, HOOK1, SPEM1, GALNTL5, DDX25, GPX4, 1110017D15RIK, NEURL1A, CDK16, SPATA24, M1AP, OSBP2, CABS1, TLE3, UBE2J1, ADAM26A, NME8, THEG, TXNDC2, BTG1, TXNDC8, SPATA18, SPATA19, CATSPER1, PEBP1, SLC9C1, KLHL10, RAD23B, H1FNT, CREM, ACSBG2, ROPN1, AKAP14, HSPA1L, OAZ3, TCP11, ACE, CDYL, CNR1, DNMT3L, ODF4, ODF2, ODF1, SPATA6, 3830403N18RIK, SPATA32, FSCN3, PAIP2, …
BP	GO:0007276~gamete generation	74	2.00219e-09	SLC22A16, SPATA20, CAPZA3, NR6A1, PRDX4, HOOK1, SPEM1, WNT3, GALNTL5, DDX25, GPX4, 1110017D15RIK, NEURL1A, CDK16, SPATA24, M1AP, OSBP2, CABS1, TLE3, UBE2J1, ADAM26A, NME8, THEG, TXNDC2, BTG1, TXNDC8, SPATA18, SPATA19, CATSPER1, PEBP1, SLC9C1, KLHL10, RAD23B, H1FNT, CREM, ACSBG2, ROPN1, AKAP14, PAQR5, HSPA1L, OAZ3, TCP11, ACE, CDYL, CNR1, DNMT3L, ODF4, ODF2, ODF1, SPATA6, 3830403N18RIK, SPATA32, F…
BP	GO:0030317~sperm motility	18	2.1096e-08	SLC22A16, SMCP, PLDI, ATP1A4, TNP1, ROPN1, NME8, TNP2, GAPDHS, SPEM1, TXNDC2, IQCF1, PRM3, CATSPER1, SLC9C1, NEURL1A, PGK2, AKAP4
BP	GO:0007286~spermatid development	26	4.13865e-06	OSBP2, H1FNT, CAPZA3, FSCN3, UBE2J1, TNP1, ROPN1, CABYR, HOOK1, SPEM1, IQCF1, GALNTL5, TXNDC8, DDX25, GM20736, PEBP1, TSSK2, ODF2, PRM1, NEURL1A, KLHL10, PRM2, TBC1D20, TSSK3, TSSK6, 3830403N18RIK
BP	GO:0048515~spermatid differentiation	26	3.33897e-05	OSBP2, H1FNT, CAPZA3, FSCN3, UBE2J1, TNP1, ROPN1, CABYR, HOOK1, SPEM1, IQCF1, GALNTL5, TXNDC8, DDX25, GM20736, PEBP1, TSSK2, ODF2, PRM1, NEURL1A, KLHL10, PRM2, TBC1D20, TSSK3, TSSK6, 3830403N18RIK
BP	GO:0016311~dephosphorylation	32	7.56094e-05	PHLPP1, CDC14A, PPP2R5A, CDC14B, PPM1A, DUSP12, 2810408A11RIK, TIPRL, OAZ3, TSKS, 4933415F23RIK, PPP2R2B, PP2D1, PPP1R42, ZFYVE1, PPP1R36, PTPN7, TMEM225, NCKAP1L, CAMSAP3, PRKCD, EYA4, CSRNP3, PTP4A3, PTPRV, PTP4A1, PPM1H, PPM1N, SH3RF2, PPM1L, AKAP1, FAM220A
BP	GO:0007338~single fertilization	17	0.000233095	PLCZ1, SLC22A16, ZP3R, SMCP, SPA17, TNP2, HSPA1L, PMIS2, ADAM1A, IQCF1, WBP2NL, UMODL1, CATSPER1, 1700016D06RIK, CAMK2B, SPAM1, GLIPR1L1
BP	GO:0009566~fertilization	19	0.000696998	PLCZ1, SLC22A16, ZP3R, SMCP, ATP1A4, SPA17, TNP2, HSPA1L, PMIS2, WBP2NL, ADAM1A, IQCF1, UMODL1, CATSPER1, 1700016D06RIK, CAMK2B, KLHL10, SPAM1, GLIPR1L1
BP	GO:0007339~binding of sperm to zona pellucida	8	0.000810834	HSPA1L, PMIS2, ZP3R, ADAM1A, SMCP, SPA17, GLIPR1L1, TNP2
BP	GO:0006464~cellular protein modification process	177	0.00124907	AIF1, PPP2R5A, FGF14, PDGFA, STK35, ZNRF4, OTUB2, USP50, TLR9, DPY30, PRKAR2A, MAP3K5, DAB1, GRIN2B, WWP2, GATA3, CLK4, RNF38, MLKL, MAP2K7, GM5415, TEX24, NQO2, CSNK1G2, MYLK3, TRABD2B, UBE2J1, PIM1, SKP2, SOCS7, PKIB, LYPLA1, WNK2, CDKL3, CDKL2, ASB9, ASB8, RNF133, DCUN1D1, MAPK6, CAMK4, UBR7, PTPRV, NBR1, ASB1, RNF139, RNF138, AKAP1, ASB5, DSCC1, DBNDD2, CACUL1, HAX1, DUSP12, ROPN1, PXK, CDC34…
BP	GO:0036211~protein modification process	177	0.00124907	AIF1, PPP2R5A, FGF14, PDGFA, STK35, ZNRF4, OTUB2, USP50, TLR9, DPY30, PRKAR2A, MAP3K5, DAB1, GRIN2B, WWP2, GATA3, CLK4, RNF38, MLKL, MAP2K7, GM5415, TEX24, NQO2, CSNK1G2, MYLK3, TRABD2B, UBE2J1, PIM1, SKP2, SOCS7, PKIB, LYPLA1, WNK2, CDKL3, CDKL2, ASB9, ASB8, RNF133, DCUN1D1, MAPK6, CAMK4, UBR7, PTPRV, NBR1, ASB1, RNF139, RNF138, AKAP1, ASB5, DSCC1, DBNDD2, CACUL1, HAX1, DUSP12, ROPN1, PXK, CDC34…
BP	GO:0035036~sperm-egg recognition	8	0.00129786	HSPA1L, PMIS2, ZP3R, ADAM1A, SMCP, SPA17, GLIPR1L1, TNP2
BP	GO:0007281~germ cell development	27	0.00136611	OSBP2, H1FNT, CAPZA3, FSCN3, UBE2J1, TNP1, ROPN1, CABYR, PAQR5, HOOK1, SPEM1, IQCF1, GALNTL5, TXNDC8, DDX25, GM20736, PEBP1, TSSK2, ODF2, PRM1, NEURL1A, KLHL10, PRM2, TBC1D20, TSSK3, TSSK6, 3830403N18RIK
BP	GO:0045017~glycerolipid biosynthetic process	14	0.00168845	PGAP2, GPAT4, MPPE1, CDIPT, ALOX15, PIGG, PDGFA, SIK1, LPIN1, CHPT1, AGPAT2, ACSL5, PCK1, PIGA
BP	GO:0008654~phospholipid biosynthetic process	15	0.0020724	PGAP2, CDIPT, GPAT4, PDGFA, ABHD5, SGMS1, PMVK, CHPT1, ALOX15, MPPE1, PIGG, LPCAT2B, AGPAT2, ACSL5, PIGA
BP	GO:0006508~proteolysis	87	0.00304484	CSTL1, KLK1B8, KLK1B9, HECW1, KLK1B3, KLK1B5, PRSS40, RNPEPL1, ZNRF4, SERPINA3A, AQP1, SERPINA3B, OTUB2, USP50, PRSS39, DDI1, CST13, MAP3K5, WWP2, KLHL28, USP12, RNF38, DDA1, YOD1, GM5415, F11, PRSS51, PRSS52, KLK1B26, TRABD2B, SKP2, UBE2J1, NRD1, ADAM26A, UBE2N, PRKCQ, NAALAD2, CST8, ADAM1A, PSMA6, UBE2K, GZMN, RNF139, OPHN1, UBE2W, RNF138, PEBP1, KLK1B16, RNPEP, RAD23B, CACUL1, AMZ2, RFFL, CDC3…
BP	GO:0010921~regulation of phosphatase activity	13	0.00396185	PPP1R36, OAZ3, TSKS, CSRNP3, TMEM225, NCKAP1L, SH3RF2, CAMSAP3, 2810408A11RIK, PPP2R2B, PPP1R42, ZFYVE1, TIPRL
BP	GO:0044267~cellular protein metabolic process	221	0.00575517	AIF1, PPP2R5A, ZNRF4, AQP1, USP50, MAP3K5, GRIN2B, WWP2, EIF1AX, CLK4, MAP2K7, GM5415, TEX24, MYLK3, TRABD2B, PIM1, SKP2, UBE2J1, WNK2, MAPK6, UBR7, CAMK4, PTPRV, RAD23B, DBNDD2, DUSP12, PXK, CDC34, RFFL, TIPRL, ASB17, CAMKV, ACE, PPP2R2B, AF366264, 4930444G20RIK, MGAT4E, 9530002B09RIK, PAIP2, MGAT4D, FBXO2, NCKAP1L, LELP1, SLAMF1, FXR1, NAA60, BMP7, CSTL1, CPEB3, 2810408A11RIK, ART1, RBM4B, BAG1…
BP	GO:0009132~nucleoside diphosphate metabolic process	11	0.0128627	PKM, GAPDHS, ALDOART2, AK1, HK1, AK5, DHTKD1, GPI1, NME8, PGK2, ENO1B
BP	GO:0006348~chromatin silencing at telomere	3	0.0156151	DPY30, DYDC1, DYDC2
BP	GO:0046486~glycerolipid metabolic process	21	0.0163182	PGAP2, GPAT4, CDIPT, PDGFA, SLC37A4, ABHD5, LPIN1, CHPT1, GDPD1, PCK1, SERINC2, PNPLA8, ALOX15, MPPE1, ACSL1, PIGG, SIK1, AGPAT2, LIPE, ACSL5, PIGA
BP	GO:0046474~glycerophospholipid biosynthetic process	10	0.0163959	PGAP2, CDIPT, GPAT4, ALOX15, MPPE1, PIGG, PDGFA, CHPT1, AGPAT2, PIGA
BP	GO:0006096~glycolytic process	8	0.0232106	PKM, GAPDHS, ALDOART2, HK1, DHTKD1, GPI1, PGK2, ENO1B
BP	GO:0072009~nephron epithelium development	11	0.0279219	HEY1, FAT4, LHX1, AQP11, GATA3, SIX2, SIX4, GLCCI1, JAG1, AQP1, KIF26B
BP	GO:0048704~embryonic skeletal system morphogenesis	10	0.0293237	BMI1, HOXB3, HOXC9, TBX15, LHX1, HOXA6, DSCAML1, SIX2, SIX4, BMP7
BP	GO:0048240~sperm capacitation	5	0.0299842	IQCF1, PEBP1, ROPN1, TSSK3, CABYR
BP	GO:0006465~signal peptide processing	4	0.0308026	SEC11C, SPCS1, SPCS2, SPPL2C
BP	GO:0044724~single-organism carbohydrate catabolic process	10	0.0325812	PKM, GAPDHS, GPD2, ALDOART2, HK1, DHTKD1, STBD1, GPI1, PGK2, ENO1B
BP	GO:0072087~renal vesicle development	4	0.0358596	HEY1, LHX1, SIX2, KIF26B
BP	GO:1900006~positive regulation of dendrite development	9	0.0359304	COBL, MAPK6, CPEB3, IL1RAP, CAMK2B, NEURL1A, CDKL3, BMP7, ELAVL4
BP	GO:0050771~negative regulation of axonogenesis	7	0.0365477	SEMA6A, WNT3, DAB1, SEMA4G, ULK2, SEMA3E, CDKL3
BP	GO:0090183~regulation of kidney development	7	0.0365477	FAT4, LHX1, PDGFA, GATA3, SIX2, SIX4, BMP7
BP	GO:0001656~metanephros development	9	0.0400543	FAT4, LHX1, PDGFA, GATA3, SIX2, SIX4, AQP1, BMP7, KIF26B
BP	GO:0046460~neutral lipid biosynthetic process	5	0.0412388	GPAT4, SIK1, LPIN1, ACSL5, PCK1
BP	GO:0046463~acylglycerol biosynthetic process	5	0.0412388	GPAT4, SIK1, LPIN1, ACSL5, PCK1
BP	GO:0034453~microtubule anchoring	4	0.0471617	CEP57L1, CCDC187, CAMSAP3, BICD1
BP	GO:0072006~nephron development	12	0.0499789	HEY1, FAT4, LHX1, AQP11, GATA3, SIX2, SIX4, GLCCI1, JAG1, AQP1, BMP7, KIF26B
CC	GO:0036126~sperm flagellum	25	8.62029e-13	RPGR, AK1, FSCB, HK1, ROPN1, SPA17, GSTM5, NME8, CABYR, AKAP14, GAPDHS, OAZ3, ACE, TXNDC2, TXNDC8, SPATA18, RNF38, ODF4, ODF2, CATSPERG1, ODF1, SPATA6, GLIPR1L1, PGK2, AKAP4
CC	GO:0031514~motile cilium	33	1.04401e-12	HK1, STARD10, ROPN1, GSTM5, AKAP14, MLF1, OAZ3, ACE, FSIP1, RNF38, ODF4, ODF2, ODF1, CATSPERG1, SPATA6, GLIPR1L1, OXCT2B, RPGR, AK1, CABS1, FSCB, NME8, SPA17, CABYR, GAPDHS, TXNDC2, TXNDC8, SPATA18, IFT57, CATSPER1, SLC9C1, PGK2, AKAP4
CC	GO:0035686~sperm fibrous sheath	9	5.69284e-08	GAPDHS, FSCB, SPA17, NME8, GSTM5, CABYR, AKAP14, PGK2, AKAP4
CC	GO:0044441~ciliary part	35	1.76562e-05	RP2, HK1, ROPN1, GPI1, GSTM5, AKAP14, ACE, RAB28, CCSAP, KIFAP3, ODF4, ODF2, CATSPERG1, ODF1, SPATA6, GLIPR1L1, SPATA7, SCLT1, CFAP126, RPGR, KIF17, AK1, FSCB, NME8, SPA17, CABYR, GAPDHS, TXNDC2, TTLL10, IFT57, FAM161A, SLC9C1, PGK2, AKAP4, RHO
CC	GO:0097228~sperm principal piece	9	1.78254e-05	GAPDHS, FSCB, HK1, ROPN1, CATSPERG1, SPA17, NME8, CABYR, AKAP4
CC	GO:0001669~acrosomal vesicle	17	0.000508523	ZP3R, SPACA9, CAPZA3, PRSS40, TMEM225, CYLC1, PRSS39, TSKS, IQCF1, TMEM190, TXNDC8, 1700016D06RIK, TSSK2, SPAM1, GLIPR1L1, DNAJB3, SPATA31
CC	GO:0001520~outer dense fiber	5	0.000834376	TXNDC2, AK1, ODF4, ODF2, ODF1
CC	GO:0005737~cytoplasm	524	0.00955083	ALDH8A1, CDIPT, NPCD, SCN3A, AIF1, PPP2R5A, RP2, RANGAP1, VPS50, SGMS1, CTTNBP2, ACTG2, MAP3K5, GRIN2B, AQP11, LSM2, MAP2K7, BCL2L14, MYH1, MYLK3, LRRC1, SRP54C, UBE2J1, SKP2, CCDC136, NME8, ERGIC2, CTNNA3, GLUL, MAPK6, F5, GM44504, UBL4B, 1700016D06RIK, TPPP2, RAD23B, DBNDD2, ARHGEF25, CCDC92, ARHGEF28, NFKBIB, ACSBG2, NTAN1, RUNDC3A, GSTCD, CCDC91, DUSP12, RCC1, HSPA1L, TPGS2, CACYBP, DNMT3L, S…
CC	GO:0016281~eukaryotic translation initiation factor 4F complex	3	0.020373	EIF4G1, EIF4E, EIF4H
CC	GO:1990075~periciliary membrane compartment	3	0.0296084	KIF17, KIFAP3, RP2
CC	GO:0099503~secretory vesicle	33	0.0384057	ZP3R, CAPZA3, PRSS40, SYT3, NCS1, AQP1, CTTNBP2, PRSS39, PCSK1, TSKS, GRIN2B, TMEM190, SPAM1, CDK16, GLIPR1L1, CYP19A1, SPACA9, TMEM225, DPYSL3, CYLC1, IQCF1, F5, TXNDC8, SLC18A2, SLC18A3, PEBP1, 1700016D06RIK, TSSK2, SYTL3, VAMP1, DNAJB3, RNPEP, SPATA31
CC	GO:0032391~photoreceptor connecting cilium	6	0.0431529	RPGR, KIF17, KIFAP3, IFT57, FAM161A, SPATA7
CC	GO:0005741~mitochondrial outer membrane	14	0.044327	MOAP1, ACSL1, BRI3BP, HAX1, SMCP, SPATA18, SPATA19, PEBP1, HK1, TOMM22, AKAP1, PPP2R2B, LPIN1, ACSL5
MF	GO:0000287~magnesium ion binding	24	1.12791e-05	SRPK2, ADCY2, CSNK1G2, NT5C1B, PPM1A, NCS1, FDXACB1, PPA2, PCK1, ENO1B, PKM, IRAK4, GLUL, MAP3K5, CIB4, PPM1N, TSSK2, SIK1, MAP2K7, TSSK3, SIK2, YDJC, FEN1, TSSK6
MF	GO:0004175~endopeptidase activity	40	4.38209e-05	KLK1B8, ADAM39, KLK1B9, KLK1B3, PRSS40, KLK1B5, ADAM34, TASP1, DDI1, GM4787, PRSS39, PCSK1, ACE, KLKB1, USP12, ADAM30, PCSK6, GM5415, F11, AF366264, 4930444G20RIK, PRSS54, ADAM29, PRSS51, PRSS52, KLK1B26, PRSS58, ADAM25, TRABD2B, NRD1, ADAM26A, KLK1, SPPL2C, ADAM1A, PSMA6, F5, GZMN, ADAM20, ADAM21, KLK1B16
MF	GO:0008237~metallopeptidase activity	20	0.000561715	CPA5, ADAM39, ADAM29, CPA6, TRHDE, RNPEPL1, ADAM34, AMZ2, ADAM25, TRABD2B, NRD1, ADAM26A, GM4787, NAALAD2, ACE, ADAM1A, ADAM20, ADAM30, ADAM21, RNPEP
MF	GO:0008236~serine-type peptidase activity	21	0.00192149	F11, KLK1B8, KLK1B9, PRSS54, SEC11C, PRSS51, KLK1B3, PRSS52, KLK1B26, PRSS40, KLK1B5, PRSS58, KLK1, PRSS39, PCSK1, ACE, F5, KLKB1, GZMN, KLK1B16, PCSK6
MF	GO:0004672~protein kinase activity	43	0.00215431	SMOK3C, CDK18, SMOK3B, STK35, 4932414J04RIK, HK1, PXK, IRAK4, CAMKV, MAP3K5, SPEG, CLK4, MLKL, CAMK2B, CDK16, SIK1, SIK2, MAP2K7, DCLK1, SRPK2, SMOK2B, SMOK4A, TRP53RKB, CSNK1G2, PHKG2, FLT4, MYLK3, PIM1, PRKCH, MAPK11, WNK2, CDKL3, CDKL2, PRKCD, PRKCQ, MAPK6, CAMK4, HIPK1, ULK2, DYRK1B, TSSK2, TSSK3, TSSK6
MF	GO:0004252~serine-type endopeptidase activity	19	0.00324734	F11, KLK1B8, KLK1B9, PRSS54, PRSS51, KLK1B3, PRSS52, KLK1B26, PRSS40, KLK1B5, PRSS58, KLK1, PRSS39, PCSK1, F5, KLKB1, GZMN, KLK1B16, PCSK6
MF	GO:0046914~transition metal ion binding	77	0.0077917	BMI1, CDIPT, ADCY2, LMO2, NR6A1, RNPEPL1, ZNRF4, ZBBX, USP50, TRIM46, RBM4B, GRIN2B, GATA3, RNF38, NEURL1A, SREK1IP1, RNF148, SEC23A, ZCCHC13, ZDHHC4, CGRRF1, NEIL3, MICAL3, RXRG, PIM1, NRD1, MOXD1, ISCA1, GLUL, ALOX15, RNF133, F5, UBR7, NBR1, PPM1N, RNF139, RNF138, RNPEP, ZFAND3, TRIM17, PRND, AMZ2, PPM1A, ZNRD1, DUSP12, RFFL, ZDHHC19, RAG2, CYP2A12, ACE, MPPE1, LHX1, LHX2, KLKB1, ZDHHC25, TCEA1…
MF	GO:0008170~N-methyltransferase activity	10	0.00798044	DPY30, PRDM6, DYDC1, TRMT1, IRF4, DYDC2, FDXACB1, TFB1M, SUV39H2, NNMT
MF	GO:0061630~ubiquitin protein ligase activity	17	0.0116367	CACUL1, UBE2J1, SKP2, CDC34, RFFL, RAG2, TMEM189, UBE2N, RNF44, AKTIP, WWP2, UBE2K, RNF38, RNF139, RNF138, UBE2W, NEURL1A
MF	GO:0005524~ATP binding	81	0.0120042	CDK18, ADCY2, MYO7B, CLPB, STK35, 4932414J04RIK, FDXACB1, PMVK, PKM, ACTG2, KIF2C, NLRC5, ATP2B2, MAP3K5, DDX25, CLK4, MLKL, CDK16, SIK1, SUCLA2, MAP2K7, SIK2, SRPK2, SMOK4A, MYH1, TRP53RKB, CSNK1G2, KIF17, MYLK3, PHKG2, PIM1, UBE2J1, PRKCH, WNK2, CDKL3, CDKL2, PRKCD, UBE2N, PRKCQ, GLUL, KIF1A, TTLL10, HIPK1, CAMK4, MAPK6, UBE2K, PEBP1, UBE2W, SRXN1, KIF26B, SMOK3C, H1FNT, SMOK3B, ACSBG2, HK1, PX…
MF	GO:0032555~purine ribonucleotide binding	99	0.0132348	ADCY2, CDK18, MYO7B, RP2, CLPB, ATL3, STK35, 4932414J04RIK, FDXACB1, PMVK, 1700009N14RIK, PKM, KIF2C, ATP2B2, ACTG2, NLRC5, PRKAR2A, MAP3K5, ARL11, DIRAS2, RAB28, DDX25, CLK4, MLKL, SIK1, SUCLA2, CDK16, MAP2K7, SIK2, IRGC1, TUBA1C, SRPK2, SMOK4A, TRP53RKB, MYH1, KIF17, CSNK1G2, PHKG2, MYLK3, SRP54C, UBE2J1, PIM1, ARL9, PRKCH, WNK2, CDKL3, CDKL2, PRKCD, UBE2N, PRKCQ, GLUL, KIF1A, TTLL10, MAPK6, CA…
MF	GO:0032550~purine ribonucleoside binding	97	0.0152913	ADCY2, CDK18, MYO7B, RP2, CLPB, ATL3, STK35, 4932414J04RIK, FDXACB1, PMVK, 1700009N14RIK, PKM, KIF2C, ATP2B2, ACTG2, NLRC5, MAP3K5, ARL11, DIRAS2, RAB28, DDX25, CLK4, MLKL, SIK1, SUCLA2, CDK16, MAP2K7, SIK2, IRGC1, TUBA1C, SRPK2, SMOK4A, TRP53RKB, MYH1, KIF17, CSNK1G2, PHKG2, MYLK3, SRP54C, UBE2J1, PIM1, ARL9, PRKCH, WNK2, CDKL3, CDKL2, PRKCD, UBE2N, PRKCQ, GLUL, KIF1A, TTLL10, MAPK6, CAMK4, HIPK…
MF	GO:0017076~purine nucleotide binding	99	0.0159351	ADCY2, CDK18, MYO7B, RP2, CLPB, ATL3, STK35, 4932414J04RIK, FDXACB1, PMVK, 1700009N14RIK, PKM, KIF2C, ATP2B2, ACTG2, NLRC5, PRKAR2A, MAP3K5, ARL11, DIRAS2, RAB28, DDX25, CLK4, MLKL, SIK1, SUCLA2, CDK16, MAP2K7, SIK2, IRGC1, TUBA1C, SRPK2, SMOK4A, TRP53RKB, MYH1, KIF17, CSNK1G2, PHKG2, MYLK3, SRP54C, UBE2J1, PIM1, ARL9, PRKCH, WNK2, CDKL3, CDKL2, PRKCD, UBE2N, PRKCQ, GLUL, KIF1A, TTLL10, MAPK6, CA…
MF	GO:0032559~adenyl ribonucleotide binding	82	0.0161987	CDK18, ADCY2, MYO7B, CLPB, STK35, 4932414J04RIK, PMVK, FDXACB1, PKM, ACTG2, KIF2C, NLRC5, ATP2B2, MAP3K5, PRKAR2A, DDX25, CLK4, MLKL, CDK16, SIK1, SUCLA2, MAP2K7, SIK2, SRPK2, SMOK4A, MYH1, TRP53RKB, CSNK1G2, KIF17, MYLK3, PHKG2, PIM1, UBE2J1, PRKCH, WNK2, CDKL3, CDKL2, PRKCD, UBE2N, PRKCQ, GLUL, KIF1A, TTLL10, HIPK1, CAMK4, MAPK6, UBE2K, PEBP1, UBE2W, SRXN1, KIF26B, SMOK3C, H1FNT, SMOK3B, ACSBG2…
MF	GO:0032553~ribonucleotide binding	99	0.0166461	ADCY2, CDK18, MYO7B, RP2, CLPB, ATL3, STK35, 4932414J04RIK, FDXACB1, PMVK, 1700009N14RIK, PKM, KIF2C, ATP2B2, ACTG2, NLRC5, PRKAR2A, MAP3K5, ARL11, DIRAS2, RAB28, DDX25, CLK4, MLKL, SIK1, SUCLA2, CDK16, MAP2K7, SIK2, IRGC1, TUBA1C, SRPK2, SMOK4A, TRP53RKB, MYH1, KIF17, CSNK1G2, PHKG2, MYLK3, SRP54C, UBE2J1, PIM1, ARL9, PRKCH, WNK2, CDKL3, CDKL2, PRKCD, UBE2N, PRKCQ, GLUL, KIF1A, TTLL10, MAPK6, CA…
MF	GO:0030554~adenyl nucleotide binding	82	0.0184035	CDK18, ADCY2, MYO7B, CLPB, STK35, 4932414J04RIK, PMVK, FDXACB1, PKM, ACTG2, KIF2C, NLRC5, ATP2B2, MAP3K5, PRKAR2A, DDX25, CLK4, MLKL, CDK16, SIK1, SUCLA2, MAP2K7, SIK2, SRPK2, SMOK4A, MYH1, TRP53RKB, CSNK1G2, KIF17, MYLK3, PHKG2, PIM1, UBE2J1, PRKCH, WNK2, CDKL3, CDKL2, PRKCD, UBE2N, PRKCQ, GLUL, KIF1A, TTLL10, HIPK1, CAMK4, MAPK6, UBE2K, PEBP1, UBE2W, SRXN1, KIF26B, SMOK3C, H1FNT, SMOK3B, ACSBG2…
MF	GO:0016791~phosphatase activity	19	0.0310019	PTPN7, PHLPP1, CDC14A, CDC14B, NT5C1B, PPM1A, DUSP12, LPIN1, PPA2, EYA4, PTP4A3, PTPRV, PPM1H, PTP4A1, PPM1N, PHOSPHO1, PPM1L, PP2D1, PPP2R2B
MF	GO:0004550~nucleoside diphosphate kinase activity	4	0.031428	AK1, AK5, NME8, PCK1
MF	GO:0008757~S-adenosylmethionine-dependent methyltransferase activity	12	0.0345328	DPY30, BHMT2, PRDM6, DYDC1, TRMT1, IRF4, DYDC2, FDXACB1, TFB1M, SUV39H2, NSUN4, NNMT
MF	GO:0005149~interleukin-1 receptor binding	4	0.03658	IRAK4, GRIN2B, IL1RAP, TLR9
MF	GO:0008135~translation factor activity, RNA binding	10	0.0375359	EIF4G1, EIF4E, CPEB3, EIF4H, EIF1AX, EEF1G, TCEA1, EIF1, EEF1D, ETF1
MF	GO:0005509~calcium ion binding	40	0.0379879	PLCZ1, EFCAB9, EFCAB7, PCDHA2, AIF1, SYT3, NCS1, PCDHGC5, JAG1, PCDHGA4, KCNIP2, KCNIP4, NECAB2, NECAB1, ATP2B2, CIB4, FAT4, CALML3, EFCAB1, LPCAT2B, PCDHA12, SPATA21, GPD2, TCHH, EFCAB10, GUCA1A, SCUBE2, CABS1, TESCL, FSCB, CDHR2, PADI3, PCDH9, 1700109H08RIK, NRXN1, PCDH7, CABYR, DSG1A, UMODL1, SYTL3
MF	GO:0102391~decanoate--CoA ligase activity	3	0.0408652	ACSL1, ACSBG2, ACSL5
MF	GO:0042166~acetylcholine binding	4	0.0421361	CHRNA9, CHRNA5, SLC18A3, CHRNA2
MF	GO:0061631~ubiquitin conjugating enzyme activity	5	0.0422375	UBE2N, UBE2K, UBE2J1, UBE2W, CDC34
MF	GO:0004864~protein phosphatase inhibitor activity	5	0.0465439	PPP1R36, PHACTR1, 4933415F23RIK, SH3RF2, 2810408A11RIK
